# Supplementary material
Source: publisher site journal article supplement (doi:10.3762/bjoc.1.5)
Supplement: Additional file 1 [file 1860-5397-1-5-S1.pdf]

# Synthesis of Highly Substituted Allenylsilanes by Alkylidenation of Silylketenes

Stephen P. Marsden\* and Pascal C. Ducept

## Experimental section

This document contains full experimental protocols for the preparation of silyldiazoketones **2**, silylketenes **1** and all allenylsilanes **6**, **7**, and **14-19**.

## Experimental

### *General procedure for the preparation of silyldiazoketones 2*

#### **1-Diazo-1-triethylsilylpropan-2-one 2a**

Triethylsilyl trifluoromethanesulfonate (0.35 ml, 1.56 mmol) was added dropwise to a stirred solution of 1-diazopropan-2-one (0.094 g, 1.12 mmol) and dry DIPEA (0.39 ml, 2.24 mmol) in diethyl ether (5 ml) at 0°C. After 30 min, the reaction mixture was allowed to warm to rt, diluted with ether (10 ml) and washed successively with a saturated aqueous sodium hydrogen carbonate solution (2 ml), a saturated ammonium chloride solution (2 x 10 ml) and finally with brine (15 ml) and the combined organics dried (MgSO<sub>4</sub>), filtered and evaporated under reduced pressure. The crude product was purified by flash chromatography (90:10 petroleum ether:diethyl ether) to yield 1-diazo-1-triethylsilylpropan-2-one **2a** as a yellow liquid (0.181 g, 82 %).

$\nu_{\max}$  (KBr/film) 2961 s, 2878 s, 2066 s (C=N<sub>2</sub>), 1732 s, 1643 s (C=O), 1464 m, 1359 m, 1270 s, 1203 s, 1018 s, 725 s cm<sup>-1</sup>;  $\delta_{\text{H}}$  (300 MHz, CDCl<sub>3</sub>) 0.74 (6 H, q,  $J = 8$  Hz, SiCH<sub>2</sub>CH<sub>3</sub>), 0.95 (9 H, t,  $J = 8$  Hz, SiCH<sub>2</sub>CH<sub>3</sub>), 2.23 (3 H, s, CH<sub>3</sub>);  $\delta_{\text{C}}$  (75 MHz, CDCl<sub>3</sub>) 2.7 SiCH<sub>2</sub>CH<sub>3</sub>, 6.8 SiCH<sub>2</sub>CH<sub>3</sub>, 26.4 CH<sub>3</sub>, 53.3 C=N<sub>2</sub>, 195.3 C=O;  $m/z$  (Cl<sup>+</sup>, NH<sub>3</sub>) 199 ([M+H]<sup>+</sup>, 100), 102 (33), 85 ([M-SiEt<sub>3</sub>+2H]<sup>+</sup>, 35); HRMS (Cl<sup>+</sup>) Found [M+H]<sup>+</sup> 199.1267 C<sub>9</sub>H<sub>19</sub>N<sub>2</sub>OSi, requires 199.1267

#### **1-Diazo-1-triethylsilylnonan-2-one 2b**

Carried out by the general procedure above, with 1-diazononan-2-one (1.36 g, 8.08 mmol), triethylsilyl trifluoromethanesulfonate (2.2 ml, 9.7 mmol) and DIPEA (2.1 ml, 12.1 mmol) in diethyl ether (40 ml). The crude product was purified by flash chromatography (95:5 petroleum ether:diethyl ether) to yield 1-diazo-1-triethylsilylnonan-2-one **2b** as a yellow liquid (2.116 g, 93 %).

$\nu_{\max}$  (KBr/film) 2956 s, 2064 s (C=N<sub>2</sub>), 1642 s (C=O), 1463 w, 1181 w, 1007 m, 725 w cm<sup>-1</sup>;  $\delta_{\text{H}}$  (270 MHz, CDCl<sub>3</sub>) 0.74 (6 H, q,  $J = 8$  Hz, SiCH<sub>2</sub>CH<sub>3</sub>), 0.85 (3 H, t,  $J_{9-8} = 7$  Hz, H<sub>9</sub>), 0.96 (9 H, t,  $J = 8$  Hz, SiCH<sub>2</sub>CH<sub>3</sub>), 1.20-1.36 (8 H, m, H<sub>5,6,7,8</sub>), 1.61 (2 H, p,  $J = 7.5$  Hz, H<sub>4</sub>), 2.48 (2 H,

t,  $J_{3,4} = 7$  Hz, H<sub>3</sub>);  $\delta_C$  (75 MHz, CDCl<sub>3</sub>) 3.0 SiCH<sub>2</sub>CH<sub>3</sub>, 7.1 SiCH<sub>2</sub>CH<sub>3</sub>, 14.0 C<sub>9</sub>, 22.6 C<sub>8</sub>, 24.7, 29.0, 29.2 C<sub>5,6,7</sub>, 31.7 C<sub>4</sub>, 39.2 C<sub>3</sub>, 55.0 C=N<sub>2</sub>, 198.8 C=O;  $m/z$  (Cl<sup>+</sup>, NH<sub>3</sub>) 283 ([M+H]<sup>+</sup>, 15), 255 ([M-N<sub>2</sub>+H]<sup>+</sup>, 100), 188 (30), 132 ([SiEt<sub>3</sub>+NH<sub>3</sub>]<sup>+</sup>, 61); HRMS (Cl<sup>+</sup>) Found [M+H]<sup>+</sup> 283.2252 C<sub>15</sub>H<sub>31</sub>N<sub>2</sub>OSi, requires 283.2206

### 1-Diazo-3-phenyl-1-triethylsilylpropan-2-one 2c

Carried out by the general procedure above, with 1-diazo-3-phenylpropan-2-one (0.8 g, 5 mmol), triethylsilyl trifluoromethanesulfonate (1.35 ml, 6 mmol) and DIPEA (1.3 ml, 7.5 mmol) in diethyl ether (20 ml). The crude product was purified by flash chromatography (95:5 petroleum ether:diethyl ether) to yield 1-diazo-3-phenyl-1-triethylsilylpropan-2-one **2c** as a yellow liquid (2.116 g, 93 %).

$\nu_{\max}$  (KBr/film) 2955 s, 2910 m, 2876 m, 2066 s (C=N<sub>2</sub>), 1637 s (C=O), 1454 w, 1414 w, 1280 m, 1200 m, 1005 m, 725 s, 701 s cm<sup>-1</sup>;  $\delta_H$  (300 MHz, CDCl<sub>3</sub>) 0.72 (6 H, q,  $J = 8$  Hz, SiCH<sub>2</sub>CH<sub>3</sub>), 0.91 (9 H, t,  $J = 8$  Hz, SiCH<sub>2</sub>CH<sub>3</sub>), 3.82 (2 H, s, H<sub>3</sub>), 7.20-7.34 (5 H, m, Ph);  $\delta_C$  (75 MHz, CDCl<sub>3</sub>) 2.9 SiCH<sub>2</sub>CH<sub>3</sub>, 7.0 SiCH<sub>2</sub>CH<sub>3</sub>, 46.4 PhCH<sub>2</sub>, 52.6 C=N<sub>2</sub>, 126.9 C<sub>4'</sub>, 128.6 C<sub>2'</sub> or C<sub>3'</sub>, 129.1 C<sub>3'</sub> or C<sub>2'</sub>, 134.4 C<sub>1'</sub>, 195.6 C=O;  $m/z$  (Cl<sup>+</sup>, NH<sub>3</sub>) 275 ([M+H]<sup>+</sup>, 92), 247 ([M-N<sub>2</sub>+H]<sup>+</sup>, 100), 161 ([M-SiEt<sub>3</sub>+H]<sup>+</sup>, 49), 132 ([SiEt<sub>3</sub>+NH<sub>3</sub>]<sup>+</sup>, 55), 104 (40), 91 ([PhCH<sub>2</sub>]<sup>+</sup>, 43); HRMS (Cl<sup>+</sup>) Found [M+H]<sup>+</sup> 275.1575 C<sub>15</sub>H<sub>23</sub>N<sub>2</sub>OSi, requires 275.1579

### 1-Cyclohexyl-2-diazo-2-triethylsilylethan-1-one 2d

Carried out by the general procedure above with 1-cyclohexyl-2-diazoethan-1-one (1.05 g, 6.9 mmol), triethylsilyl trifluoromethanesulfonate (1.9 ml, 8.28 mmol) and DIPEA (1.8 ml, 10.35 mmol) in diethyl ether (30 ml). The crude product was purified by flash chromatography (95:5 petroleum ether:diethyl ether) to yield 1-cyclohexyl-2-diazo-2-triethylsilylethan-1-one **2d** as a yellow liquid (1.74 g, 94 %).

$\nu_{\max}$  (KBr/film) 2933 s, 2875 m, 2856 m, 2061 s (C=N<sub>2</sub>), 1641 s (C=O), 1452 w, 1251 m, 1214 m, 1187 m, 1172 m, 1006 w, 727 m, 700 w cm<sup>-1</sup>;  $\delta_H$  (300 MHz, CDCl<sub>3</sub>) 0.71 (6 H, q,  $J = 8$  Hz, SiCH<sub>2</sub>CH<sub>3</sub>), 0.92 (9 H, t,  $J = 8$  Hz, SiCH<sub>2</sub>CH<sub>3</sub>), 1.13-1.48 (6 H, m, H<sub>3',4'</sub>), 1.62-1.78 (4 H, m,

H<sub>2</sub>), 2.57 (1 H, tt,  $J = 11$  Hz, H<sub>1</sub>);  $\delta_C$  (75 MHz, CDCl<sub>3</sub>) 2.9 SiCH<sub>2</sub>CH<sub>3</sub>, 7.0 SiCH<sub>2</sub>CH<sub>3</sub>, 25.6, 29.0 C<sub>2,3</sub>, 25.7 C<sub>4</sub>, 47.2 C<sub>1</sub>, 50.6 C=N<sub>2</sub>, 202.0 C=O;  $m/z$  (Cl<sup>+</sup>, NH<sub>3</sub>) 267 ([M+H]<sup>+</sup>, 100), 256 ([M-N<sub>2</sub>+NH<sub>4</sub>]<sup>+</sup>, 20), 239 ([M-N<sub>2</sub>+H]<sup>+</sup>, 85), 132 ([SiEt<sub>3</sub>+NH<sub>3</sub>]<sup>+</sup>, 31), 119 (24); HRMS (Cl<sup>+</sup>) Found [M+H]<sup>+</sup> 267.1880 C<sub>14</sub>H<sub>27</sub>N<sub>2</sub>OSi, requires 267.1892

### 2-Diazo-1-phenyl-2-triethylsilylethan-1-one 2e

Carried out by the general procedure above with 2-diazo-1-phenyl-ethan-1-one (0.67 g, 4.58 mmol), triethylsilyl trifluoromethanesulfonate (1.24 ml, 5.5 mmol) and DIPEA (1.2 ml, 6.86 mmol) in diethyl ether (20 ml). The crude product was purified by flash chromatography (95:5 petroleum ether:diethyl ether) to yield 2-diazo-1-phenyl-2-triethylsilyl-ethan-1-one **2e** as a yellow liquid (0.96 g, 80 %).

$\nu_{\max}$  (KBr/film) 3064 w, 2955 m, 2910 w, 2876 m, 2067 s (C=N<sub>2</sub>), 1621 s (C=O), 1577 m, 1316 m, 1298 m, 1284 m, 1241 w, 1207 w, 1113 w, 1079 w, 1007 w cm<sup>-1</sup>;  $\delta_H$  (300 MHz, CDCl<sub>3</sub>) 0.84 (6 H, q,  $J = 8$  Hz, SiCH<sub>2</sub>CH<sub>3</sub>), 1.00 (9 H, t,  $J = 8$  Hz, SiCH<sub>2</sub>CH<sub>3</sub>), 7.38-7.53 (3 H, m, H<sub>3,4</sub>), 7.57-7.60 (2 H, m, H<sub>2</sub>);  $\delta_C$  (75 MHz, CDCl<sub>3</sub>) 3.0 SiCH<sub>2</sub>CH<sub>3</sub>, 7.1 SiCH<sub>2</sub>CH<sub>3</sub>, 53.0 C=N<sub>2</sub>, 127.0, 128.5 C<sub>2,3</sub>, 131.3 C<sub>4</sub>, 138.6 C<sub>1</sub>, 193.6 C=O;  $m/z$  (Cl<sup>+</sup>, NH<sub>3</sub>) 261 ([M+H]<sup>+</sup>, 30), 250 (11), 234 ([M-N<sub>2</sub>+H]<sup>+</sup>, 58), 132 ([SiEt<sub>3</sub>+NH<sub>3</sub>]<sup>+</sup>, 100); HRMS (Cl<sup>+</sup>) Found [M+H]<sup>+</sup> 261.1421 C<sub>14</sub>H<sub>21</sub>N<sub>2</sub>OSi, requires 261.1423

### 2-Diazo-1-(4-methoxyphenyl)-2-triethylsilylethan-1-one 2f

Carried out by the general procedure above with 2-diazo-1-(4-methoxyphenyl)-ethan-1-one (1.057 g, 6 mmol), triethylsilyl trifluoromethanesulfonate (2 ml, 9 mmol) and DIPEA (2.1 ml, 12 mmol) in diethyl ether (30 ml). The crude product was purified by flash chromatography (90:10 petroleum ether:diethyl ether) to yield 2-diazo-1-(4-methoxyphenyl)-2-triethylsilyl ethan-1-one **2f** as a yellow liquid (0.608 g, 35 %).

$\nu_{\max}$  (KBr/film) 2956 s, 2910 m, 2875 m, 2065 s (C=N<sub>2</sub>), 1616 s (C=O), 1514 m, 1313 m, 1290 s, 1172 m cm<sup>-1</sup>;  $\delta_H$  (270 MHz, CDCl<sub>3</sub>) 0.80 (6 H, q,  $J = 8$  Hz, SiCH<sub>2</sub>CH<sub>3</sub>), 0.99 (9 H, t,  $J = 8$  Hz, SiCH<sub>2</sub>CH<sub>3</sub>), 3.83 (3 H, s, OCH<sub>3</sub>), 6.90 (2 H, d,  $J_{3-2} = 9$  Hz, H<sub>3</sub>), 7.60 (2 H, d,  $J_{2-3} = 9$

Hz, H<sub>2</sub>); δ<sub>C</sub> (75 MHz, CDCl<sub>3</sub>) 3.0 SiCH<sub>2</sub>CH<sub>3</sub>, 7.1 SiCH<sub>2</sub>CH<sub>3</sub>, 51.1 C=N<sub>2</sub>, 55.4 OCH<sub>3</sub>, 113.7 C<sub>3</sub>, 129.2 C<sub>2</sub>, 131.3 C<sub>1</sub>, 162.1 C<sub>4</sub>, 192.3 C=O; *m/z* (CI+, NH<sub>3</sub>) 291 ([M+H]<sup>+</sup>, 20), 263 ([M-N<sub>2</sub>+H]<sup>+</sup>, 100), 252 (42), 235 (52), 132 ([SiEt<sub>3</sub>+NH<sub>3</sub>]<sup>+</sup>, 59); HRMS (CI+) Found [M+H]<sup>+</sup> 291.1522 C<sub>15</sub>H<sub>23</sub>N<sub>2</sub>O<sub>2</sub>Si, requires 291.1529

### 2-Diazo-1-(4-bromophenyl)-2-triethylsilylethan-1-one **2g**

Carried out by the general procedure above with 2-diazo-1-(4-bromophenyl)-ethan-1-one (0.675 g, 3 mmol), triethylsilyl trifluoromethanesulfonate (0.95 ml, 3.6 mmol) and DIPEA (0.78 ml, 4.5 mmol) in diethyl ether (10 ml). The crude product was purified by flash chromatography (95:5 petroleum ether:diethyl ether) to yield 2-diazo-1-(4-bromo phenyl)-2-triethylsilylethan-1-one **2g** as a yellow liquid (0.92 g, 90 %).

*v*<sub>max</sub> (KBr/film) 2954 s, 2910 m, 2875 s, 2069 s (C=N<sub>2</sub>), 1614 s (C=O), 1587 m, 1303 s, 1292 s, 1205 m, 1105 m, 1070 m, 1010 s, 742 s cm<sup>-1</sup>; δ<sub>H</sub> (270 MHz, CDCl<sub>3</sub>) 0.79 (6 H, q, *J* = 8 Hz, SiCH<sub>2</sub>CH<sub>3</sub>), 0.99 (9 H, t, *J* = 8 Hz, SiCH<sub>2</sub>CH<sub>3</sub>), 7.46 (2 H, d, *J*<sub>3-2'</sub> = 8.5 Hz, H<sub>3</sub>), 7.55 (2 H, d, H<sub>2</sub>, *J*<sub>2-3'</sub> = 8.5 Hz); δ<sub>C</sub> (67.5 MHz, CDCl<sub>3</sub>) 2.9 SiCH<sub>2</sub>CH<sub>3</sub>, 7.1 SiCH<sub>2</sub>CH<sub>3</sub>, 52.3 C=N<sub>2</sub>, 125.8 C<sub>4</sub>, 128.6, 131.7 C<sub>2,3</sub>, 137.2 C<sub>1</sub>, 192.2 C=O; *m/z* (CI+, NH<sub>3</sub>) 341 ([M<sup>81</sup>Br+H]<sup>+</sup>, 100), 339 ([M<sup>79</sup>Br+H]<sup>+</sup>, 98), 313 ([M<sup>81</sup>Br-N<sub>2</sub>+H]<sup>+</sup>, 41), 311 ([M<sup>79</sup>Br-N<sub>2</sub>+H]<sup>+</sup>, 42), 244 ([M<sup>81</sup>Br-SiEt<sub>3</sub>+NH<sub>4</sub>]<sup>+</sup>, 84), 242 ([M<sup>79</sup>Br-SiEt<sub>3</sub>+NH<sub>4</sub>]<sup>+</sup>, 89), 227 (68), 225 (67), 132 ([SiEt<sub>3</sub>+NH<sub>3</sub>]<sup>+</sup>, 78), 106 (41), 89 (72); HRMS (CI+) Found [M+H]<sup>+</sup> 341.0503 C<sub>14</sub>H<sub>20</sub><sup>81</sup>BrN<sub>2</sub>OSi, requires 341.0501

### 2-Diazo-1-(2-furyl)-2-triethylsilylethan-1-one **2h**

Carried out by the general procedure above with 2-diazo-1-(2-furyl)-ethan-1-one (1.088 g, 8 mmol), triethylsilyl trifluoromethanesulfonate (2.7 ml, 12 mmol) and DIPEA (2.8 ml, 16 mmol) in diethyl ether (40 ml). The crude product was purified by flash chromatography (90:10 petroleum ether:diethyl ether) to yield 2-diazo-1-(2-furyl)-2-triethylsilylethan-1-one **2h** as a yellow liquid (1.486 g, 74 %).

*v*<sub>max</sub> (KBr/film) 3115 w, 2949 m, 2899 m, 2870 m, 2074 s (C=N<sub>2</sub>), 1587 s (C=O), 1468 m, 1326 m, 1217 m, 1160 m cm<sup>-1</sup>; δ<sub>H</sub> (300 MHz, CDCl<sub>3</sub>) 0.81 (6 H, q, *J* = 8 Hz, SiCH<sub>2</sub>CH<sub>3</sub>), 0.98

(9 H, t,  $J = 8$  Hz, SiCH<sub>2</sub>CH<sub>3</sub>), 6.50 (1 H, dd,  $J_{4'-3'} = 3.5$  Hz,  $J_{4'-5'} = 1.5$  Hz, H<sub>4'</sub>), 7.07 (1 H, dd,  $J_{3'-4'} = 3.5$  Hz,  $J_{3'-5'} = 1$  Hz, H<sub>3'</sub>), 7.47 (1 H, dd,  $J_{5'-4'} = 1.5$  Hz,  $J_{5'-3'} = 1$  Hz, H<sub>5'</sub>);  $\delta_C$  (75 MHz, CDCl<sub>3</sub>) 3.0 SiCH<sub>2</sub>CH<sub>3</sub>, 7.1 SiCH<sub>2</sub>CH<sub>3</sub>, 51.1 C=N<sub>2</sub>, 111.9, 114.8 C<sub>3',4'</sub>, 143.9 C<sub>5'</sub>, 153.3 C<sub>2'</sub>, 178.6 C=O;  $m/z$  (CI+, NH<sub>3</sub>) 251 ([M+H]<sup>+</sup>, 73), 240 (42), 223 ([M-N<sub>2</sub>+H]<sup>+</sup>, 100), 195 (55), 132 ([SiEt<sub>3</sub>+NH<sub>3</sub>]<sup>+</sup>, 54), 104 (22); HRMS (CI+) Found [M+H]<sup>+</sup> 251.1222 C<sub>12</sub>H<sub>19</sub>N<sub>2</sub>O<sub>2</sub>Si, requires 251.1216

## 2-Diazo-1-(2-thiophenyl)-2-triethylsilylethan-1-one 2i

The experiment was carried out by the general procedure for the preparation of silyl diazoketones with 2-diazo-1-(2-thiophenyl)-ethan-1-one (0.43 g, 2.85 mmol), triethylsilyl trifluoromethanesulfonate (0.77 ml, 3.42 mmol) and DIPEA (0.75 ml, 4.275 mmol) in diethyl ether (20 ml). The crude product was purified by flash chromatography (90:10 petroleum ether:diethyl ether) to yield 2-diazo-1-(2-thiophenyl)-2-triethylsilylethan-1-one **2i** as a yellow liquid (0.554 g, 73 %).

$\nu_{\max}$  (KBr/film) 2956 m, 2909 w, 2876 w, 2064 s (C=N<sub>2</sub>), 1594 s (C=O), 1416 s, 1302 s, 1240 w, 1203 w, 1005 w, 723 s cm<sup>-1</sup>;  $\delta_H$  (270 MHz, CDCl<sub>3</sub>) 0.81 (6 H, q,  $J = 8$  Hz, SiCH<sub>2</sub>CH<sub>3</sub>), 0.99 (9 H, t,  $J = 8$  Hz, SiCH<sub>2</sub>CH<sub>3</sub>), 7.07 (1 H, dd,  $J_{4'-3'} = 5$  Hz,  $J_{4'-5'} = 4$  Hz, H<sub>4'</sub>), 7.52 (1 H, dd,  $J_{3'-4'} = 5$  Hz,  $J_{3'-5'} = 1$  Hz, H<sub>3'</sub>), 7.55 (1 H, dd,  $J_{5'-4'} = 4$  Hz,  $J_{5'-3'} = 1$  Hz, H<sub>5'</sub>);  $\delta_C$  (67.5 MHz, CDCl<sub>3</sub>) 2.8 SiCH<sub>2</sub>CH<sub>3</sub>, 7.1 SiCH<sub>2</sub>CH<sub>3</sub>, 50.6 C=N<sub>2</sub>, 127.5, 129.1 C<sub>3',4'</sub>, 131.2 C<sub>5'</sub>, 143.7 C<sub>2'</sub>, 182.6 C=O;  $m/z$  (CI+, NH<sub>3</sub>) 284 ([M+NH<sub>4</sub>]<sup>+</sup>, 10), 267 ([M+H]<sup>+</sup>, 100), 256 (36), 239 ([M-N<sub>2</sub>+H]<sup>+</sup>, 80), 238 (48), 228 (34), 211 (42), 132 ([SiEt<sub>3</sub>+NH<sub>3</sub>]<sup>+</sup>, 48); HRMS (CI+) Found [M+H]<sup>+</sup> 267.0989 C<sub>12</sub>H<sub>19</sub>N<sub>2</sub>OSSi, requires 267.0987

## 1-(3-(1-*tert*-Butoxycarbonyl)indolyl)-2-diazo-2-triethylsilylethan-1-one 2j

Carried out by the general procedure above with 1-(3-(1-*tert*-butoxycarbonyl)indolyl)-2-diazo-1-ethanone (0.335 g, 1.235 mmol), triethylsilyl trifluoromethanesulfonate (0.34 ml, 1.48 mmol) and DIPEA (0.32 ml, 1.85 mmol) in diethyl ether (10 ml). The crude product was purified by flash chromatography (95:5 petroleum ether:diethyl ether) to yield 1-(3-(1-*tert*-

butoxycarbonyl)indolyl)-2-diazo-2-triethylsilylethan-1-one **2j** as a yellow liquid (0.229 g, 46 %).

$\nu_{\max}$  (KBr/film) 2956 m, 2936 m, 2911 m, 2877 m, 2062 s (C=N<sub>2</sub>), 1742 s (C=O Boc), 1608 m (C=O diazo), 1544 m, 1479 m, 1451 s, 1373 m, 1337 w, 1309 w, 1276 m, 1253 m, 1198 m, 1154 s, 1018 s cm<sup>-1</sup>;  $\delta_{\text{H}}$  (270 MHz, CDCl<sub>3</sub>) 0.88 (6 H, q,  $J = 8$  Hz, SiCH<sub>2</sub>CH<sub>3</sub>), 1.02 (9 H, t,  $J = 8$  Hz, SiCH<sub>2</sub>CH<sub>3</sub>), 1.67 (9 H, s, C(CH<sub>3</sub>)), 7.27-7.38 (2 H, m, *Ind*H), 8.00-8.13 (2 H, m, *Ind*H), 8.00 (1 H, s, H<sub>2</sub>);  $\delta_{\text{C}}$  (75 MHz, CDCl<sub>3</sub>) 3.1 SiCH<sub>2</sub>CH<sub>3</sub>, 7.2 SiCH<sub>2</sub>CH<sub>3</sub>, 28.1 C(CH<sub>3</sub>), 51.8 C=N<sub>2</sub>, 85.0 C(CH<sub>3</sub>), 114.9, 122.1, 123.9, 125.3, 128.1 C<sub>2,4,5,6,7</sub>, 119.7, 127.8, 134.9 C<sub>3,3a,7a</sub>, 149.0 C=O (Boc), 181.6 C=O;  $m/z$  (CI+, NH<sub>3</sub>) 400 ([M+H]<sup>+</sup>, 6), 389 ([M-N<sub>2</sub>+NH<sub>4</sub>]<sup>+</sup>, 52), 371 ([M-N<sub>2</sub>]<sup>+</sup>, 70), 344 (56), 315 (76), 233 (100), 132 ([SiEt<sub>3</sub>+NH<sub>3</sub>]<sup>+</sup>, 79), 119 (65); HRMS (CI+) Found [M+H]<sup>+</sup> 400.2077 C<sub>21</sub>H<sub>30</sub>N<sub>3</sub>O<sub>3</sub>Si, requires 400.2056

### **General procedure for the preparation of silyl ketenes 1**

#### **2-Triethylsilylpropen-2-one 1a**

To a stirred solution of 1-diazo-1-triethylsilylpropan-2-one **2a** (1.09 g, 5.5 mmol) in dry benzene (5 ml) was added Rh<sub>2</sub>(octanoate)<sub>4</sub> (0.043 g, 0.055 mmol). The resulting solution was stirred at rt for 15 min. Afterwards, the reaction mixture was concentrated under reduced pressure and the residual oil purified by flash chromatography (100 % petroleum ether) to yield 2-triethylsilylpropen-1-one **1a** as a colourless liquid (0.463 g, 50 %).

$\nu_{\max}$  (KBr/film) 2955 s, 2911 m, 2877 s, 2088 s (C=O), 1790 w, 1725 w, 1458 w, 1239 w, 1093 w, 1018 w, 1004 w, 954 w, 738 m, 722 m, 710 m cm<sup>-1</sup>;  $\delta_{\text{H}}$  (300 MHz, CDCl<sub>3</sub>) 0.61 (6 H, q,  $J = 8$  Hz, SiCH<sub>2</sub>CH<sub>3</sub>), 0.94 (9 H, t,  $J = 8$  Hz, SiCH<sub>2</sub>CH<sub>3</sub>) 1.54 (3 H, s, CH<sub>3</sub>);  $\delta_{\text{C}}$  (67.5 MHz, CDCl<sub>3</sub>) 3.3 SiCH<sub>2</sub>CH<sub>3</sub>, 7.1 SiCH<sub>2</sub>CH<sub>3</sub>, 11.0 C<sub>2</sub>, 53.4 C<sub>3</sub>, 181.9 C<sub>1</sub>;  $m/z$  (CI+, NH<sub>3</sub>) 188 ([M+NH<sub>4</sub>]<sup>+</sup>, 13), 171 ([M+H]<sup>+</sup>, 100), 132 ([SiEt<sub>3</sub>+NH<sub>3</sub>]<sup>+</sup>, 49); HRMS (CI+) Found [M+H]<sup>+</sup> 171.1205 C<sub>9</sub>H<sub>19</sub>OSi, requires 171.1205

#### **2-Triethylsilylnon-1-en-1-one 1b**

Carried out by the general procedure above with 1-diazo-1-triethylsilylnonan-2-one **2b** (7.35 g, 26 mmol) and Rh<sub>2</sub>(octanoate)<sub>4</sub> (0.2 g, 0.26 mmol) in benzene (50 ml). The crude product was purified by flash chromatography (petroleum ether) to yield 2-triethylsilylnon-1-en-1-one **1b** as a colourless liquid (4.97 g, 75 %).

$\nu_{\max}$  (KBr/film) 2956 s, 2928 s, 2876 m, 2083 s (C=O), 1573 w, 1462 w, 1005 w, 720 w cm<sup>-1</sup>;  $\delta_{\text{H}}$  (300 MHz, CDCl<sub>3</sub>) 0.60 (6 H, q,  $J = 8$  Hz, SiCH<sub>2</sub>CH<sub>3</sub>), 0.85 (3 H, t,  $J_{9-8} = 7$  Hz, H<sub>9</sub>), 0.94 (9 H, t,  $J = 8$  Hz, SiCH<sub>2</sub>CH<sub>3</sub>), 1.20-1.32 (8 H, m, H<sub>5,6,7,8</sub>), 1.46 (2 H, p,  $J = 7.5$  Hz, H<sub>4</sub>), 1.85 (2 H, t,  $J_{3-4} = 7$  Hz, H<sub>3</sub>);  $\delta_{\text{C}}$  (75 MHz, CDCl<sub>3</sub>) 3.6 SiCH<sub>2</sub>CH<sub>3</sub>, 7.1 SiCH<sub>2</sub>CH<sub>3</sub>, 9.4 C<sub>2</sub>, 14.0 C<sub>9</sub>, 22.6 C<sub>8</sub>, 29.0, 29.2 C<sub>5,6,7</sub>, 31.7, 31.8 C<sub>3,4</sub>, 181.9 C<sub>1</sub>;  $m/z$  (Cl<sup>+</sup>, NH<sub>3</sub>) 255 ([M+H]<sup>+</sup>, 100), 132 ([SiEt<sub>3</sub>+NH<sub>3</sub>]<sup>+</sup>, 56); HRMS (Cl<sup>+</sup>) Found [M+H]<sup>+</sup> 255.2146 C<sub>15</sub>H<sub>31</sub>OSi, requires 255.2144

### 3-Phenyl-2-triethylsilylpropen-1-one **1c**

Carried out by the general procedure above with 1-diazo-3-phenyl-1-triethylsilylpropan-2-one **2c** (0.274 g, 1 mmol) and Rh<sub>2</sub>(octanoate)<sub>4</sub> (0.007 g, 0.01 mmol) in benzene (5 ml). The crude product was purified by flash chromatography (petroleum ether) to yield 3-phenyl-2-triethylsilylpropen-1-one **1c** as a colourless liquid (0.158 g, 64 %).

$\nu_{\max}$  (KBr/film) 3030 w, 2955 m, 2912 m, 2875 m, 2088 s (C=O), 1494 w, 1454 w, 1414 w, 1239 w, 1007 m, 735 m, 716 m, 700 m cm<sup>-1</sup>;  $\delta_{\text{H}}$  (270 MHz, CDCl<sub>3</sub>) 0.65 (6 H, q,  $J = 8$  Hz, SiCH<sub>2</sub>CH<sub>3</sub>), 0.99 (9 H, t,  $J = 8$  Hz, SiCH<sub>2</sub>CH<sub>3</sub>), 3.25 (2 H, s, C<sub>3</sub>), 7.20-7.39 (5 H, m, Ph);  $\delta_{\text{C}}$  (75 MHz, CDCl<sub>3</sub>) 3.5 SiCH<sub>2</sub>CH<sub>3</sub>, 7.1 SiCH<sub>2</sub>CH<sub>3</sub>, 11.5 C<sub>2</sub>, 28.0 PhCH<sub>2</sub>, 126.5 C<sub>4</sub>, 128.0, 128.4 C<sub>2,3</sub>, 141.1 C<sub>1</sub>, 181.7 C<sub>1</sub>;  $m/z$  (Cl<sup>+</sup>, NH<sub>3</sub>) 247 ([M+H]<sup>+</sup>, 100), 217 (18), 132 ([SiEt<sub>3</sub>+NH<sub>3</sub>]<sup>+</sup>, 22); HRMS (Cl<sup>+</sup>) Found [M+H]<sup>+</sup> 247.1510 C<sub>15</sub>H<sub>23</sub>OSi, requires 247.1518

### 2-Cyclohexyl-2-triethylsilylethen-1-one **1d**

Carried out by the general procedure above with 1-cyclohexyl-2-diazo-2-triethylsilylethan-1-one **2d** (1.74 g, 6.53 mmol) and Rh<sub>2</sub>(octanoate)<sub>4</sub> (0.051 g, 0.065 mmol) in benzene (15 ml) at 50°C. The crude product was purified by flash chromatography (petroleum ether) to yield 2-cyclohexyl-2-triethylsilylethen-1-one **1d** as a colourless liquid (1.209 g, 77 %).

$\nu_{\max}$  (KBr/film) 2954 s, 2929 s, 2877 m, 2852 m, 2078 s (C=O), 1448 w, 1515 w, 1236 w, 1006 w, 732 m  $\text{cm}^{-1}$ ;  $\delta_{\text{H}}$  (300 MHz,  $\text{CDCl}_3$ ) 0.62 (6 H, q,  $J = 8$  Hz,  $\text{SiCH}_2\text{CH}_3$ ), 0.95 (9 H, t,  $J = 8$  Hz,  $\text{SiCH}_2\text{CH}_3$ ), 1.17-1.27 (5 H, m), 1.61-1.88 (6 H, m);  $\delta_{\text{C}}$  (75 MHz,  $\text{CDCl}_3$ ) 4.0  $\text{SiCH}_2\text{CH}_3$ , 7.1  $\text{SiCH}_2\text{CH}_3$ , 17.2  $\text{C}_2$ , 25.9  $\text{C}_4$ , 26.3  $\text{C}_3$ , 33.8  $\text{C}_1$ , 36.4  $\text{C}_2$ , 182.6  $\text{C}_1$ ;  $m/z$  ( $\text{Cl}^+$ ,  $\text{NH}_3$ ) 239 ( $[\text{M}+\text{H}]^+$ , 100), 132 ( $[\text{SiEt}_3+\text{NH}_3]^+$ , 17); HRMS ( $\text{Cl}^+$ ) Found  $[\text{M}+\text{H}]^+$  239.1841  $\text{C}_{14}\text{H}_{27}\text{OSi}$ , requires 239.1831

### 2-Phenyl-2-triethylsilylethen-1-one **1e**

Carried out by the general procedure above with 2-diazo-1-phenyl-2-triethylsilylethan-1-one **2e** (0.96 g, 3.68 mmol) and  $\text{Rh}_2(\text{octanoate})_4$  (0.029 g, 0.0368 mmol) in benzene (8 ml) at  $50^\circ\text{C}$ . The crude product was purified by flash chromatography (petroleum ether) to yield 2-phenyl-2-triethylsilylethen-1-one **1e** as a colourless liquid (0.365 g, 43 %).

$\nu_{\max}$  (KBr/film) 3059 w, 2957 m, 2877 m, 2082 s (C=O), 1597 m, 1496 m, 1463 w, 1416 w, 1318 w, 1167 w, 1074 w, 1032 w, 1004 m, 920 m, 752 m, 737 m, 723 m, 706 m, 694 m  $\text{cm}^{-1}$ ;  $\delta_{\text{H}}$  (300 MHz,  $\text{CDCl}_3$ ) 0.75 (6 H, q,  $J = 8$  Hz,  $\text{SiCH}_2\text{CH}_3$ ), 0.97 (9 H, t,  $J = 8$  Hz,  $\text{SiCH}_2\text{CH}_3$ ), 7.07-7.10 (3 H, m,  $\text{H}_{3,4}$ ), 7.21-7.26 (2 H, m,  $\text{H}_2$ );  $\delta_{\text{C}}$  (75 MHz,  $\text{CDCl}_3$ ) 4.0  $\text{SiCH}_2\text{CH}_3$ , 7.1  $\text{SiCH}_2\text{CH}_3$ , 20.2  $\text{C}_2$ , 124.6  $\text{C}_4$ , 128.1, 128.9  $\text{C}_{2,3}$ , 131.8  $\text{C}_1$ , 181.8  $\text{C}_1$ ;  $m/z$  ( $\text{Cl}^+$ ,  $\text{NH}_3$ ) 250 ( $[\text{M}+\text{NH}_4]^+$ , 15), 233 ( $[\text{M}+\text{H}]^+$ , 27), 154 (53), 132 ( $[\text{SiEt}_3+\text{NH}_3]^+$ , 49), 118 (59); HRMS ( $\text{Cl}^+$ ) Found  $[\text{M}+\text{H}]^+$  233.1367  $\text{C}_{14}\text{H}_{21}\text{OSi}$ , requires 233.1362

### 2-(4-Methoxyphenyl)-2-triethylsilylethen-1-one **1f**

Carried out by the general above with 2-diazo-1-(4-methoxyphenyl)-2-triethylsilylethan-1-one **2f** (0.157 g, 0.54 mmol) and  $\text{Rh}_2(\text{octanoate})_4$  (0.004 g, 0.0054 mmol) in benzene (3 ml) at  $50^\circ\text{C}$ . The crude product was purified by flash chromatography (petroleum ether) to yield 2-(4-methoxyphenyl)-2-triethylsilylethen-1-one **1f** as a colourless liquid (0.033 g, 23 %).

$\nu_{\max}$  (KBr/film) 2956 s, 2912 m, 2877 m, 2085 s (C=O), 1606 w, 1576 w, 1510 s, 1465 w, 1282 m, 1245 s, 1180 w, 1038 m, 1007 w, 913 w, 826 m  $\text{cm}^{-1}$ ;  $\delta_{\text{H}}$  (270 MHz,  $\text{CDCl}_3$ ) 0.71 (6 H, q,  $J = 8$  Hz,  $\text{SiCH}_2\text{CH}_3$ ), 0.96 (9 H, t,  $J = 8$  Hz,  $\text{SiCH}_2\text{CH}_3$ ), 3.76 (3 H, s,  $\text{OCH}_3$ ), 6.81 (2 H,

d,  $J_{3'-2'} = 9$  Hz,  $H_{3'}$ ), 7.01 (2 H, d,  $J_{2'-3'} = 9$  Hz,  $H_{2'}$ ),  $\delta_C$  (62.5 MHz,  $CDCl_3$ ) 3.9  $SiCH_2CH_3$ , 7.1  $SiCH_2CH_3$ , 18.5  $C_2$ , 55.3  $OCH_3$ , 114.5  $C_3$ , 122.7  $C_{1'}$ , 129.6  $C_2'$ , 157.2  $C_4'$ , 182.1  $C_1$ ;  $m/z$  ( $Cl^+$ ,  $NH_3$ ) 263 ( $[M+H]^+$ , 45), 262 ( $[M]^+$ , 100), 234 (52), 132 ( $[SiEt_3+NH_3]^+$ , 39); HRMS ( $Cl^+$ ) Found  $[M+H]^+$  263.1467  $C_{15}H_{23}O_2Si$ , requires 263.1472

### 2-(4-Bromophenyl)-2-triethylsilylethen-1-one **1g**

Carried out by the general procedure above with 2-diazo-1-(4-bromophenyl)-2-triethylsilylethan-1-one **2g** (0.9 g, 2.65 mmol) and  $Rh_2(octanoate)_4$  (0.021 g, 0.0265 mmol) in benzene (10 ml) at 60°C. The crude product was purified by flash chromatography (petroleum ether) to yield 2-(4-bromophenyl)-2-triethylsilylethen-1-one **1g** as a colourless liquid (0.32 g, 40 %).

$\nu_{max}$  (KBr/film) 2956 s, 2910 m, 2977 s, 2088 s (C=O), 1486 s, 1166 m, 1076 m, 1008 s, 914 w, 817 s, 736 s, 723  $s\ cm^{-1}$ ;  $\delta_H$  (300 MHz,  $CDCl_3$ ) 0.77 (6 H, q,  $J = 8$  Hz,  $SiCH_2CH_3$ ), 0.98 (9 H, t,  $J = 8$  Hz,  $SiCH_2CH_3$ ), 6.96 (2 H, d,  $J_{3'-2'} = 8.5$  Hz,  $H_{3'}$ ), 7.36 (2 H, d,  $J_{2'-3'} = 8.5$  Hz,  $H_{2'}$ );  $\delta_C$  (75 MHz,  $CDCl_3$ ) 3.9  $SiCH_2CH_3$ , 7.1  $SiCH_2CH_3$ , 19.9  $C_2$ , 118.0  $C_4'$ , 129.5, 132.0  $C_{4',2'}$ , 131.1  $C_{1'}$ , 181.1  $C_1$ ;  $m/z$  ( $Cl^+$ ,  $NH_3$ ) 348 (20), 346 (19), 313 ( $[M^{81}Br+H]^+$ , 35), 311 ( $[M^{79}Br+H]^+$ , 33), 244 (14), 242 (15), 233 ( $[M-Br+2H]^+$ , 12) 227 (20), 225 (19), 132 ( $[SiEt_3+NH_3]^+$ , 100), 52 (35); HRMS ( $Cl^+$ ) Found  $[M+H]^+$  313.0437  $C_{14}H_{20}^{81}BrOSi$ , requires 313.0446

### 2-(2-Furyl)-2-triethylsilylethen-1-one **1h**

Carried out by the general procedure above with 2-diazo-1-(2-furyl)-2-triethylsilylethan-1-one **2h** (0.375 g, 1.5 mmol) and  $Rh_2(octanoate)_4$  (0.011 g, 0.015 mmol) in benzene (5 ml) at 60°C. The crude product was purified by flash chromatography (petroleum ether) to yield 2-(2-furyl)-2-triethylsilylethen-1-one **1h** as a pale yellow liquid (0.132 g, 40 %).

$\nu_{max}$  (KBr/film) 2958 m, 2878 m, 2099 s (C=O), 1587 m, 1510 w, 1500 w, 1462 w, 1416 w, 1217 m, 1181 m, 1074 w, 1015  $s\ cm^{-1}$ ;  $\delta_H$  (300 MHz,  $CDCl_3$ ) 0.74 (6 H, q,  $J = 8$  Hz,  $SiCH_2CH_3$ ), 0.96 (9 H, t,  $J = 8$  Hz,  $SiCH_2CH_3$ ), 5.89 (1 H, dd,  $J_{3'-4'} = 3$  Hz,  $J_{3'-5'} = 0.5$  Hz,  $H_{3'}$ ), 6.31 (1 H, dd,  $J_{4'-3'} = 3$  Hz,  $J_{4'-5'} = 2$  Hz,  $H_{4'}$ ), 7.26 (1 H, dd,  $J_{5'-4'} = 2$  Hz,  $J_{5'-3'} = 0.5$  Hz,  $H_{5'}$ );  $\delta_C$

(75 MHz, CDCl<sub>3</sub>) 3.8 SiCH<sub>2</sub>CH<sub>3</sub>, 7.0 SiCH<sub>2</sub>CH<sub>3</sub>, 14.0 C<sub>2</sub>, 104.7, 111.2 C<sub>3',4'</sub>, 140.5 C<sub>5'</sub>, 143.4 C<sub>2</sub>, 182.6 C<sub>1</sub>; *m/z* (Cl<sup>+</sup>, NH<sub>3</sub>) 223 ([M+H]<sup>+</sup>, 100), 132 ([SiEt<sub>3</sub>+NH<sub>3</sub>]<sup>+</sup>, 26), 104 (40); HRMS (Cl<sup>+</sup>) Found [M+H]<sup>+</sup> 223.1174 C<sub>12</sub>H<sub>19</sub>N<sub>2</sub>O<sub>2</sub>Si, requires 223.1154

### 2-(2-Thiophenyl)-2-triethylsilylethen-1-one **1i**

Carried out by the general procedure above with 2-diazo-1-(2-thiophenyl)-2-triethylsilylethan-1-one **2i** (0.55 g, 2.06 mmol) and Rh<sub>2</sub>(octanoate)<sub>4</sub> (0.016 g, 0.02 mmol) in benzene (4 ml) at 60°C. The crude product was purified by flash chromatography (petroleum ether) to yield 2-(2-thiophenyl)-2-triethylsilylethen-1-one **1i** as a pale yellow liquid (0.190 g, 39 %).

$\nu_{\max}$  (KBr/film) 2956 m, 2911 w, 2877 w, 2089 s (C=O), 1526 w, 1457 w, 1415 w, 1238 w, 1132 w, 1004 m, 864 m, 841 m, 722 s, 687 s cm<sup>-1</sup>;  $\delta_{\text{H}}$  (300 MHz, CDCl<sub>3</sub>) 0.75 (6 H, q, *J* = 8 Hz, SiCH<sub>2</sub>CH<sub>3</sub>), 0.99 (9 H, t, *J* = 8 Hz, SiCH<sub>2</sub>CH<sub>3</sub>), 6.70 (1 H, dd, *J*<sub>5'-4'</sub> = 3.5 Hz, *J*<sub>5'-3'</sub> = 1 Hz, H<sub>5'</sub>), 6.95 (1 H, dd, *J*<sub>4'-3'</sub> = 5 Hz, *J*<sub>4'-5'</sub> = 3.5 Hz, H<sub>4'</sub>), 7.11 (1 H, dd, *J*<sub>3'-4'</sub> = 5 Hz, *J*<sub>3'-5'</sub> = 1 Hz, H<sub>3'</sub>);  $\delta_{\text{C}}$  (75 MHz, CDCl<sub>3</sub>) 3.7 SiCH<sub>2</sub>CH<sub>3</sub>, 7.1 SiCH<sub>2</sub>CH<sub>3</sub>, 14.4 C<sub>2</sub>, 123.1, 124.8 C<sub>3',4'</sub>, 127.3 C<sub>5'</sub>, 131.4 C<sub>2</sub>, 180.3 C<sub>1</sub>; *m/z* (Cl<sup>+</sup>, NH<sub>3</sub>) 239 ([M+H]<sup>+</sup>, 100), 238 ([M]<sup>+</sup>, 57), 132 ([SiEt<sub>3</sub>+NH<sub>3</sub>]<sup>+</sup>, 22); HRMS (Cl<sup>+</sup>) Found [M+H]<sup>+</sup> 239.0920 C<sub>12</sub>H<sub>19</sub>OSSi, requires 239.0926

### 2-(3-(1-*tert*-Butoxycarbonyl)indolyl)-2-triethylsilylethen-1-one **1j**

Carried out by the general procedure above with 1-(3-(1-*tert*-butoxycarbonyl)indolyl)-2-diazo-2-triethylsilylethan-1-one **2j** (0.202 g, 0.5 mmol) and Rh<sub>2</sub>(octanoate)<sub>4</sub> (0.004 g, 0.005 mmol) in benzene (3 ml) at 40°C. The crude product was purified by flash chromatography (petroleum ether) to yield 2-(3-(1-*tert*-butoxycarbonyl)indolyl)-2-triethylsilylethen-1-one **1j** as a colourless liquid (0.094 g, 51 %).

$\nu_{\max}$  (KBr/film) 3054 w, 2955 m, 2912 m, 2877 m, 2085 s (C=O), 1733 s (C=O Boc), 1476 m, 1456 m, 1418 m, 1373 m, 1298 m, 1246 m, 1215 m, 1158 m, 1123 w, 1096 m, 1042 w, 1021 m cm<sup>-1</sup>;  $\delta_{\text{H}}$  (270 MHz, CDCl<sub>3</sub>) 0.77 (6 H, q, *J* = 8 Hz, SiCH<sub>2</sub>CH<sub>3</sub>), 0.99 (9 H, t, *J* = 8 Hz, SiCH<sub>2</sub>CH<sub>3</sub>), 1.66 (9 H, s, C(CH<sub>3</sub>)), 7.21-7.34 (3 H, m, *IndH*), 7.58 (1 H, dd, *J* = 7 Hz, *J* = 1.5 Hz, *IndH*), 8.07 (1 H, br d, *J* = 7 Hz, *IndH*);  $\delta_{\text{C}}$  (75 MHz, CDCl<sub>3</sub>) 3.8 SiCH<sub>2</sub>CH<sub>3</sub>, 7.1 SiCH<sub>2</sub>CH<sub>3</sub>,

9.2 C<sub>2</sub>, 28.2 C(CH<sub>3</sub>), 83.6 C(CH<sub>3</sub>), 115.3, 119.1, 121.2, 122.5, 124.7 C<sub>2',4',5',6',7'</sub>, 108.7, 130.7, 135.0 C<sub>3',3a',7a'</sub>, 149.6 C=O, Boc, 181.0 C<sub>1</sub>; *m/z* (Cl<sup>+</sup>, NH<sub>3</sub>) 372 ([M+H]<sup>+</sup>, 100), 344 ([M-N<sub>2</sub>+H]<sup>+</sup>, 86), 315 (92), 286 (17), 271 (60), 242 (20), 132 ([SiEt<sub>3</sub>+NH<sub>3</sub>]<sup>+</sup>, 27), 104 (12); HRMS (Cl<sup>+</sup>) Found [M+H]<sup>+</sup> 372.1988 C<sub>21</sub>H<sub>30</sub>NO<sub>3</sub>Si, requires 372.1995

***General procedure for the preparation of allenylsilanes from silyl ketenes and stabilised phosphorus ylides***

**Ethyl 2-methyl-4-triethylsilylpenta-2,3-dienoate 6a**

To a solution of 2-triethylsilylpropen-2-one **1a** (0.031 g, 0.18 mmol) in toluene (1.5 ml) under a nitrogen atmosphere was added in one portion (1-ethoxycarbonyl-ethylidene)triphenylphosphorane (**4**, 0.073 g, 0.20 mmol). The mixture was then heated to gentle reflux and monitored by TLC for complete consumption of the silylketene. Hexane (10 ml) was then added and the white precipitate removed by filtration. The filtrate was concentrated under reduced pressure and the residual oil purified by flash chromatography (95:5 petroleum ether:diethyl ether) to yield ethyl 2-methyl-4-triethylsilylpenta-2,3-dienoate **6a** as a colourless liquid (0.025 g, 54 %).

$\nu_{\max}$  (KBr/film) 2957 s, 2936 m, 2876 m, 1932 s (C=C=C), 1705 s (C=O), 1458 w, 1267 s, 1238 w, 1119 m, 1003 w, 737 m, 719 m, 712 m cm<sup>-1</sup>;  $\delta_{\text{H}}$  (300 MHz, CDCl<sub>3</sub>) 0.59 (6 H, q, *J* = 8 Hz, SiCH<sub>2</sub>CH<sub>3</sub>), 0.93 (9 H, t, *J* = 8 Hz, SiCH<sub>2</sub>CH<sub>3</sub>), 1.21 (3 H, t, *J* = 7 Hz, CH<sub>2</sub>CH<sub>3</sub>), 1.73 (3 H, s, CH<sub>3</sub>), 1.78 (3 H, s, CH<sub>3</sub>), 4.07 (1 H, dq, *J* = 11 Hz, *J* = 7 Hz, CH<sub>2</sub>CH<sub>3</sub>), 4.19 (1 H, dq, *J* = 11 Hz, *J* = 7 Hz, CH<sub>2</sub>CH<sub>3</sub>);  $\delta_{\text{C}}$  (67.5 MHz, CDCl<sub>3</sub>) 2.8 SiCH<sub>2</sub>CH<sub>3</sub>, 7.1 SiCH<sub>2</sub>CH<sub>3</sub>, 14.3, 14.6, 14.7 CH<sub>2</sub>CH<sub>3</sub>, 2-CH<sub>3</sub>, C<sub>5</sub>, 60.3 CH<sub>2</sub>CH<sub>3</sub>, 88.4 C<sub>2</sub>, 90.7 C<sub>4</sub>, 160.8 C=O, 208.8 C<sub>3</sub>; *m/z* (Cl<sup>+</sup>, NH<sub>3</sub>) 272 ([M+NH<sub>4</sub>]<sup>+</sup>, 50), 255 ([M+H]<sup>+</sup>, 100); HRMS (Cl<sup>+</sup>) Found [M+H]<sup>+</sup> 255.1781 C<sub>14</sub>H<sub>27</sub>O<sub>2</sub>Si, requires 255.1780

**Ethyl 4-triethylsilylpenta-2,3-dienoate 7a**

Carried out by the general procedure above with 2-triethylsilylpropen-2-one **1a** (0.064 g, 0.375 mmol) and (ethoxycarbonylmethylene)triphenylphosphorane (**5**, 0.157 g, 0.45 mmol) in DCM (2 ml) at rt. The crude product was purified by flash chromatography (95:5 petroleum

ether:diethyl ether) to yield ethyl 4-triethylsilylpenta-2,3-dienoate **7a** as a colourless liquid (0.054 g, 60 %).

$\nu_{\max}$  (KBr/film) 2956 m, 2914 w, 2877 w, 1933 s (C=C=C), 1714 s (C=O), 1457 w, 1402 w, 1382 w, 1248 s, 1200 s, 1145 s, 1044 w, 1005 w, 817 w, 806 w, 728 m, 723 m  $\text{cm}^{-1}$ ;  $\delta_{\text{H}}$  (270 MHz,  $\text{CDCl}_3$ ) 0.61 (6 H, q,  $J = 8$  Hz,  $\text{SiCH}_2\text{CH}_3$ ), 0.93 (9 H, t,  $J = 8$  Hz,  $\text{SiCH}_2\text{CH}_3$ ), 1.21 (3 H, t,  $J = 7$  Hz,  $\text{CH}_2\text{CH}_3$ ), 1.75 (3 H, d,  $J_{5-2} = 2.5$  Hz,  $\text{H}_5$ ), 4.06 (1 H, dq,  $J = 11$  Hz,  $J = 7$  Hz,  $\text{H}_a$  or  $\text{H}_b$ ), 4.16 (1 H, dq,  $J = 11$  Hz,  $J = 7$  Hz,  $\text{H}_b$  or  $\text{H}_a$ ), 5.16 (1 H, q,  $J_{2-5} = 2.5$  Hz,  $\text{H}_2$ );  $\delta_{\text{C}}$  (75 MHz,  $\text{CDCl}_3$ ) 2.6  $\text{SiCH}_2\text{CH}_3$ , 7.0  $\text{SiCH}_2\text{CH}_3$ , 14.2, 14.4  $\text{CH}_2\text{CH}_3$ ,  $\text{CH}_3$ , 60.2  $\text{CH}_2\text{CH}_3$ , 81.2  $\text{C}_2$ , 91.9  $\text{C}_4$ , 168.1 C=O, 209.1  $\text{C}_3$ ;  $m/z$  ( $\text{Cl}^+$ ,  $\text{NH}_3$ ) 258 ( $[\text{M}+\text{NH}_4]^+$ , 40), 241 ( $[\text{M}+\text{H}]^+$ , 100); HRMS ( $\text{Cl}^+$ ) Found  $[\text{M}+\text{H}]^+$  241.1619  $\text{C}_{13}\text{H}_{25}\text{O}_2\text{Si}$ , requires 241.1624

### Ethyl 2-methyl-4-triethylsilylundeca-2,3-dienoate **6b**

Carried out by the general procedure above with 2-triethylsilylnon-1-en-1-one **1b** (0.076 g, 0.3 mmol) and (1-ethoxycarbonyl ethylidene)triphenylphosphorane (**4**, 0.114 g, 0.315 mmol) in refluxing toluene (3 ml). The crude product was purified by flash chromatography (95:5 petroleum ether:diethyl ether) to yield ethyl 2-methyl-4-triethylsilylundeca-2,3-dienoate **6b** as a colourless liquid (0.045 g, 45 %).

$\nu_{\max}$  (KBr/film) 2956 s, 2926 s, 2875 s, 2857 m, 1929 s (C=C=C), 1705 s (C=O), 1458 w, 1267 s, 1236 w, 1118 s, 1004 w, 735 m, 720 m  $\text{cm}^{-1}$ ;  $\delta_{\text{H}}$  (270 MHz,  $\text{CDCl}_3$ ) 0.59 (6 H, q,  $J = 8$  Hz,  $\text{SiCH}_2\text{CH}_3$ ), 0.86 (3 H, t,  $J_{11-10} = 6.5$  Hz,  $\text{H}_{11}$ ), 0.92 (9 H, t,  $J = 8$  Hz,  $\text{SiCH}_2\text{CH}_3$ ), 1.20 (3 H, t,  $J = 7$  Hz,  $\text{CH}_2\text{CH}_3$ ), 1.20-1.32 (8 H, m,  $\text{H}_{7,8,9,10}$ ), 1.44 (2 H, p,  $J = 7.5$  Hz,  $\text{H}_6$ ), 1.78 (3 H, s, 2- $\text{CH}_3$ ), 2.00 (2 H, t,  $J_{5-6} = 6.5$  Hz,  $\text{H}_5$ ), 4.09 (1 H, dq,  $J = 10.5$  Hz,  $J = 7$  Hz,  $\text{CH}_2\text{CH}_3$ ), 4.16 (1 H, dq,  $J = 10.5$  Hz,  $J = 7$  Hz,  $\text{CH}_2\text{CH}_3$ );  $\delta_{\text{C}}$  (75 MHz,  $\text{CDCl}_3$ ) 3.0  $\text{SiCH}_2\text{CH}_3$ , 7.1  $\text{SiCH}_2\text{CH}_3$ , 14.1, 14.3, 14.5  $\text{C}_{11}$ , 2- $\text{CH}_3$ ,  $\text{CH}_2\text{CH}_3$ , 22.6, 29.0, 29.1, 29.2 (2 peaks)  $\text{C}_{6,7,8,9,10}$ , 31.8  $\text{C}_5$ , 60.2  $\text{CH}_2\text{CH}_3$ , 89.8  $\text{C}_4$ , 96.2  $\text{C}_2$ , 169.9 C=O, 208.6  $\text{C}_3$ ;  $m/z$  ( $\text{Cl}^+$ ,  $\text{NH}_3$ ) 339 ( $[\text{M}+\text{H}]^+$ , 100); HRMS ( $\text{Cl}^+$ ) Found  $[\text{M}+\text{H}]^+$  339.2714  $\text{C}_{20}\text{H}_{39}\text{O}_2\text{Si}$ , requires 339.2719

### Ethyl 4-triethylsilylundeca-2,3-dienoate **7b**

Carried out by the general procedure above with 2-triethylsilylnon-1-en-1-one **1b** (0.382 g, 1.5 mmol) and (ethoxycarbonylmethylene) triphenylphosphorane (**5**, 0.627 g, 1.8 mmol) in refluxing DCM (5 ml). The crude product was purified by flash chromatography (90:10 petroleum ether:diethyl ether) to yield ethyl 4-triethylsilylundeca-2,3-dienoate **7b** as a colourless liquid (0.375 g, 77 %).

$\nu_{\max}$  (KBr/film) 2954 s, 2929 s, 2875 m, 2858 w, 1928 s (C=C=C), 1714 s (C=O), 1463 w, 1405 w, 1380 w, 1245 s, 1193 m, 1143 s, 1045 w, 1004 w, 806 w, 736 m, 723 m  $\text{cm}^{-1}$ ;  $\delta_{\text{H}}$  (270 MHz,  $\text{CDCl}_3$ ) 0.62 (6 H, q,  $J = 8$  Hz,  $\text{SiCH}_2\text{CH}_3$ ), 0.85 (3 H, t,  $J_{11-10} = 6.5$  Hz,  $\text{H}_{11}$ ), 0.94 (9 H, t,  $J = 8$  Hz,  $\text{SiCH}_2\text{CH}_3$ ), 1.22 (3 H, t,  $J = 7$  Hz,  $\text{CH}_2\text{CH}_3$ ), 1.19-1.36 (8 H, m,  $\text{H}_{7,8,9,10}$ ), 1.47 (2 H, p,  $J = 7.5$  Hz,  $\text{H}_6$ ), 2.00 (2 H, m,  $\text{H}_5$ ), 4.10 (1 H, dq,  $J = 11$  Hz,  $J = 7$  Hz,  $\text{CH}_2\text{CH}_3$ ), 4.17 (1 H, dq,  $J = 11$  Hz,  $J = 7$  Hz,  $\text{CH}_2\text{CH}_3$ ), 5.23 (1 H, t,  $J_{2-5} = 3$  Hz,  $\text{H}_2$ );  $\delta_{\text{C}}$  (75 MHz,  $\text{CDCl}_3$ ) 2.8  $\text{SiCH}_2\text{CH}_3$ , 6.9  $\text{SiCH}_2\text{CH}_3$ , 13.9, 14.1  $\text{C}_{11}$ ,  $\text{CH}_2\text{CH}_3$ , 22.5, 28.5, 28.8, 29.0, 29.1  $\text{C}_{6,7,8,9,10}$ , 31.7  $\text{C}_5$ , 60.0  $\text{CH}_2\text{CH}_3$ , 82.6  $\text{C}_4$ , 97.2  $\text{C}_2$ , 167.9 C=O, 208.7  $\text{C}_3$ ;  $m/z$  ( $\text{Cl}^+$ ,  $\text{NH}_3$ ) 342 ( $[\text{M}+\text{NH}_4]^+$ , 24), 325 ( $[\text{M}+\text{H}]^+$ , 100), 132 ( $[\text{SiEt}_3+\text{NH}_3]^+$ , 12); HRMS ( $\text{Cl}^+$ ) Found  $[\text{M}+\text{H}]^+$  325.2567  $\text{C}_{19}\text{H}_{37}\text{O}_2\text{Si}$ , requires 325.2563

### **Ethyl 2-methyl-5-phenyl-4-triethylsilylpenta-2,3-dienoate 6c**

Carried out by the general procedure above with 3-phenyl-2-triethylsilylpropen-1-one **1c** (0.123 g, 0.5 mmol) and (1-ethoxycarbonyl-ethylidene) triphenylphosphorane (**4**, 0.200 g, 0.55 mmol) in refluxing benzene (3 ml). The crude product was purified by flash chromatography (90:10 petroleum ether:diethyl ether) to yield ethyl 2-methyl-5-phenyl-4-triethylsilylpenta-2,3-dienoate **6c** as a colourless liquid (0.099 g, 60 %).

$\nu_{\max}$  (KBr/film) 3026 w, 2953 m, 2909 m, 2875 m, 1929 s (C=C=C), 1704 s (C=O), 1454 w, 1267 s, 1238 w, 1120 s, 1006 m, 762 w, 736 m, 719 m, 699 m  $\text{cm}^{-1}$ ;  $\delta_{\text{H}}$  (300 MHz,  $\text{CDCl}_3$ ) 0.51 (6 H, q,  $J = 8$  Hz,  $\text{SiCH}_2\text{CH}_3$ ), 0.87 (9 H, t,  $J = 8$  Hz,  $\text{SiCH}_2\text{CH}_3$ ), 1.25 (3 H, t,  $J = 7$  Hz,  $\text{CH}_2\text{CH}_3$ ), 1.72 (3 H, s,  $\text{CH}_3$ ), 3.32 (1 H, d,  $J = 15$  Hz,  $\text{H}_5$ ), 3.43 (1 H, d,  $J = 15$  Hz,  $\text{H}_5$ ), 4.13 (2 H, q,  $J = 7$  Hz,  $\text{CH}_2\text{CH}_3$ ), 7.16-7.25 (5 H, m, Ph);  $\delta_{\text{C}}$  (75 MHz,  $\text{CDCl}_3$ ) 3.0  $\text{SiCH}_2\text{CH}_3$ , 7.0  $\text{SiCH}_2\text{CH}_3$ , 14.3  $\text{CH}_2\text{CH}_3$  and  $\text{CH}_3$  (2 peaks overlapped), 36.1  $\text{C}_5$ , 60.3  $\text{CH}_2\text{CH}_3$ , 89.8  $\text{C}_2$ , 95.9

C<sub>4</sub>, 126.2 C<sub>4'</sub>, 128.0, 128.8 C<sub>2,3'</sub>, 139.4 C<sub>1'</sub>, 169.4 C<sub>1</sub>, 210.5 C<sub>3</sub>; *m/z* (CI+, NH<sub>3</sub>) 348 ([M+NH<sub>4</sub>]<sup>+</sup>, 25), 331 ([M+H]<sup>+</sup>, 100); HRMS (CI+) Found [M+H]<sup>+</sup> 331.2102 C<sub>20</sub>H<sub>31</sub>O<sub>2</sub>Si, requires 331.2093

### **Ethyl 5-phenyl-4-triethylsilylpenta-2,3-dienoate 7c**

Carried out by the general procedure above with 3-phenyl-2-triethylsilylpropen-1-one **1c** (0.098 g, 0.4 mmol) and (ethoxycarbonylmethylene)triphenylphosphorane (**5**, 0.153 g, 0.44 mmol) in DCM (2 ml) at rt. The crude product was purified by flash chromatography (90:10 petroleum ether:diethyl ether) to yield ethyl 5-phenyl-4-triethylsilylpenta-2,3-dienoate **7c** as a colourless liquid (0.103 g, 81 %).

$\nu_{\max}$  (KBr/film) 3062 w, 3029 w, 2954 s, 2912 w, 2877 m, 1928 s (C=C=C), 1711 s (C=O), 1454 w, 1247 s, 1172 m, 1140 m, 1043 m, 1044 m, 804 w, 737 s, 723 s, 700 s cm<sup>-1</sup>;  $\delta_{\text{H}}$  (300 MHz, CDCl<sub>3</sub>) 0.56 (6 H, q, *J* = 8 Hz, SiCH<sub>2</sub>CH<sub>3</sub>), 0.90 (9 H, t, *J* = 8 Hz, SiCH<sub>2</sub>CH<sub>3</sub>), 1.26 (3 H, t, *J* = 7 Hz, CH<sub>2</sub>CH<sub>3</sub>), 3.41 (2 H, m, H<sub>5</sub>), 4.15 (2 H, q, *J* = 7 Hz, CH<sub>2</sub>CH<sub>3</sub>), 5.21 (1 H, t, *J* = 2.5 Hz, H<sub>2</sub>), 7.18-7.27 (5 H, m, Ph);  $\delta_{\text{C}}$  (75 MHz, CDCl<sub>3</sub>) 2.9 SiCH<sub>2</sub>CH<sub>3</sub>, 6.9 SiCH<sub>2</sub>CH<sub>3</sub>, 14.2 CH<sub>2</sub>CH<sub>3</sub>, 35.7 C<sub>5</sub>, 60.2 CH<sub>2</sub>CH<sub>3</sub>, 82.6 C<sub>2</sub>, 96.9 C<sub>4</sub>, 126.4 C<sub>4'</sub>, 128.1, 128.8 C<sub>2,3'</sub>, 138.8 C<sub>1'</sub>, 167.7 C<sub>1</sub>, 210.6 C<sub>3</sub>; *m/z* (CI+, NH<sub>3</sub>) 334 ([M+NH<sub>4</sub>]<sup>+</sup>, 88), 333 (37), 317 ([M+H]<sup>+</sup>, 100), 316 ([M]<sup>+</sup>, 64); HRMS (CI+) Found [M+H]<sup>+</sup> 317.1937 C<sub>19</sub>H<sub>29</sub>O<sub>2</sub>Si, requires 317.1940

### **Ethyl 4-cyclohexyl-2-methyl-4-triethylsilylbuta-2,3-dienoate 6d**

Carried out by the general procedure above with 2-cyclohexyl-2-triethylsilylethen-1-one **1d** (0.072 g, 0.3 mmol) and (1-ethoxycarbonylethylidene)triphenylphosphorane (**4**, 0.120 g, 0.33 mmol) in refluxing toluene (2 ml). After 48 h the crude product was purified by flash chromatography (90:10 petroleum ether:diethyl ether) to yield ethyl 4-cyclohexyl-2-methyl-4-triethylsilylbuta-2,3-dienoate **6d** as a colourless liquid (0.021 g, 22 %) and recovered 2-cyclohexyl-2-triethylsilylethen-1-one **1d** (0.043 g, 60 %).

$\nu_{\max}$  (KBr/film) 2952 s, 2927 s, 2875 m, 2852 w, 1924 m (C=C=C), 1704 s (C=O), 1448 w, 1267 s, 1240 w, 1118 s, 1006 w, 732 m, 721 m cm<sup>-1</sup>;  $\delta_{\text{H}}$  (270 MHz, CDCl<sub>3</sub>) 0.59 (6 H, q, *J* = 8

Hz, SiCH<sub>2</sub>CH<sub>3</sub>), 0.92 (9 H, t, *J* = 8 Hz, SiCH<sub>2</sub>CH<sub>3</sub>), 1.11-1.30 (5 H, m), 1.19 (3 H, t, *J* = 7 Hz, CH<sub>2</sub>CH<sub>3</sub>), 1.56-1.90 (6 H, m), 1.78 (3 H, s, CH<sub>3</sub>), 4.11 (2 H, q, *J* = 7 Hz, CH<sub>2</sub>CH<sub>3</sub>); δ<sub>C</sub> (75 MHz, CDCl<sub>3</sub>) 3.3 SiCH<sub>2</sub>CH<sub>3</sub>, 7.2 SiCH<sub>2</sub>CH<sub>3</sub>, 14.3, 14.5 CH<sub>3</sub>, CH<sub>2</sub>CH<sub>3</sub>, 26.0, 26.6 C<sub>3',4'</sub>, 34.0, 34.4 C<sub>2'a,2'e</sub>, 60.1 CH<sub>2</sub>CH<sub>3</sub>, 90.6 C<sub>2</sub>, 101.9 C<sub>4</sub>, 169.9 C=O, 209.5 C<sub>3</sub>; *m/z* (Cl<sup>+</sup>, NH<sub>3</sub>) 323 ([M+H]<sup>+</sup>, 100), 193 (18); HRMS (Cl<sup>+</sup>) Found [M+H]<sup>+</sup> 323.2410 C<sub>19</sub>H<sub>35</sub>O<sub>2</sub>Si, requires 323.2406

#### **Ethyl 4-cyclohexyl-4-triethylsilylbuta-2,3-dienoate 7d**

Carried out by the general procedure above with 2-cyclohexyl-2-triethylsilylethen-1-one **1d** (0.072 g, 0.3 mmol) and (ethoxycarbonylmethylene)triphenylphosphorane (**5**, 0.115 g, 0.33 mmol) in refluxing benzene (2 ml). The crude product was purified by flash chromatography (90:10 petroleum ether:diethyl ether) to yield ethyl 4-cyclohexyl-4-triethylsilylbuta-2,3-dienoate **7d** as a colourless liquid (0.072 g, 78 %).

*v*<sub>max</sub> (KBr/film) 2952 s, 2929 s, 2875 m, 2852 m, 1920 s (C=C=C), 1712 s (C=O), 1243 s, 1191 s, 1145 s, 1045 m, 1006 m, 734 m, 721 m, 698 w cm<sup>-1</sup>; δ<sub>H</sub> (270 MHz, CDCl<sub>3</sub>) 0.62 (6 H, q, *J* = 8 Hz, SiCH<sub>2</sub>CH<sub>3</sub>), 0.92 (9 H, t, *J* = 8 Hz, SiCH<sub>2</sub>CH<sub>3</sub>), 1.10-1.30 (5 H, m), 1.21 (3 H, t, *J* = 7 Hz, CH<sub>2</sub>CH<sub>3</sub>), 1.55-1.92 (6 H, m), 4.11 (2 H, app dq, *J* = 2 and 7 Hz CH<sub>2</sub>CH<sub>3</sub>), 5.23 (1 H, d, *J*<sub>2,1'</sub> = 0.5 Hz, H<sub>2</sub>); δ<sub>C</sub> (75 MHz, CDCl<sub>3</sub>) 2.9 SiCH<sub>2</sub>CH<sub>3</sub>, 7.1 SiCH<sub>2</sub>CH<sub>3</sub>, 14.2 CH<sub>2</sub>CH<sub>3</sub>, 25.9 C<sub>4'</sub>, 26.6, 26.6, 34.0, 34.1 C<sub>2',3'</sub>, 38.9 C<sub>1'</sub>, 60.1 CH<sub>2</sub>CH<sub>3</sub>, 83.4 C<sub>2</sub>, 102.9 C<sub>4</sub>, 168.2 C=O, 209.6 C<sub>3</sub>; *m/z* (Cl<sup>+</sup>, NH<sub>3</sub>) 326 ([M+NH<sub>4</sub>]<sup>+</sup>, 24), 309 ([M+H]<sup>+</sup>, 100); HRMS (Cl<sup>+</sup>) Found [M+H]<sup>+</sup> 309.2245 C<sub>18</sub>H<sub>33</sub>O<sub>2</sub>Si, requires 309.2250

#### **Ethyl 2-methyl-4-phenyl-4-triethylsilylbuta-2,3-dienoate 6e and ethyl 2-methyl-4-phenylbuta-2,3-dienoate 8e**

Carried out by the general procedure above with 2-phenyl-2-triethylsilylethen-1-one **1e** (0.097 g, 0.42 mmol) and (1-ethoxycarbonyl-ethylidene)triphenylphosphorane (**4**, 0.167 g, 0.46 mmol) in refluxing benzene (3 ml). The crude product was purified by flash chromatography (95:5 petroleum ether:diethyl ether) to yield ethyl 2-methyl-4-phenyl-4-triethylsilylbuta-2,3-dienoate **6e** as a colourless liquid (0.072 g, 55 %) and ethyl 2-methyl-4-phenylbuta-2,3-dienoate **8e** as a colourless liquid (0.006 g, 7 %).

**6e:**  $\nu_{\max}$  (KBr/film) 2954 s, 2910 m, 2875 m, 1926 s (C=C=C), 1706 s (C=O), 1596 w, 1490 w, 1267 s, 1240 m, 1118 s, 1004 m, 755 m, 734 m, 721 m, 698 m  $\text{cm}^{-1}$ ;  $\delta_{\text{H}}$  (300 MHz,  $\text{CDCl}_3$ ) 0.73 (6 H, q,  $J = 8$  Hz,  $\text{SiCH}_2\text{CH}_3$ ), 0.97 (9 H, t,  $J = 8$  Hz,  $\text{SiCH}_2\text{CH}_3$ ), 1.28 (3 H, t,  $J = 7$  Hz,  $\text{CH}_2\text{CH}_3$ ), 1.91 (3 H, s,  $\text{CH}_3$ ), 4.15 (1 H, dq,  $J = 11$  Hz,  $J = 7$  Hz,  $\text{CH}_2\text{CH}_3$ ), 4.22 (1 H, dq,  $J = 11$  Hz,  $J = 7$  Hz,  $\text{CH}_2\text{CH}_3$ ), 7.22-7.34 (5 H, m, Ph);  $\delta_{\text{C}}$  (75 MHz,  $\text{CDCl}_3$ ) 3.6  $\text{SiCH}_2\text{CH}_3$ , 7.1  $\text{SiCH}_2\text{CH}_3$ , 14.3, 14.4  $\text{CH}_3, \text{CH}_2\text{CH}_3$ , 60.6  $\text{CH}_2\text{CH}_3$ , 90.6  $\text{C}_2$ , 99.9  $\text{C}_4$ , 126.7  $\text{C}_4'$ , 127.9, 128.6  $\text{C}_{3,2'}$ , 136.1  $\text{C}_1$ , 169.0  $\text{C}_1$ , 212.3  $\text{C}_3$ ;  $m/z$  (Cl<sup>+</sup>,  $\text{NH}_3$ ) 334 ( $[\text{M}+\text{NH}_4]^+$ , 100), 317 ( $[\text{M}+\text{H}]^+$ , 22); HRMS (Cl<sup>+</sup>) Found  $[\text{M}+\text{H}]^+$  317.1925  $\text{C}_{19}\text{H}_{29}\text{O}_2\text{Si}$ , requires 317.1937

**8e:**  $\nu_{\max}$  (KBr/film) 2983 w, 2960 w, 2931 w, 1947 w (C=C=C), 1710 s (C=O), 1459 w, 1367 w, 1268 s, 1189 w, 1120 w, 1027 w, 765 w, 734 w, 692 m  $\text{cm}^{-1}$ ;  $\delta_{\text{H}}$  (300 MHz,  $\text{CDCl}_3$ ) 1.25 (3 H, t,  $J = 7$  Hz,  $\text{CH}_2\text{CH}_3$ ), 1.99 (3 H, d,  $J = 3$  Hz,  $\text{CH}_3$ ), 4.20 (2 H, q,  $J = 7$  Hz,  $\text{CH}_2\text{CH}_3$ ), 6.46 (1 H, q,  $J = 3$  Hz,  $\text{H}_4$ ), 7.21-7.35 (5 H, m, Ph);  $\delta_{\text{C}}$  (75 MHz,  $\text{CDCl}_3$ ) 14.3, 15.1  $\text{CH}_3, \text{CH}_2\text{CH}_3$ , 61.1  $\text{CH}_2\text{CH}_3$ , 97.2  $\text{C}_4$ , 99.4  $\text{C}_2$ , 127.3, 128.8  $\text{C}_{2,3'}$ , 127.6  $\text{C}_4'$ , 132.5  $\text{C}_1$ , 167.1  $\text{C}_1$ , 212.3  $\text{C}_3$ ;  $m/z$  (Cl<sup>+</sup>,  $\text{NH}_3$ ) 220 ( $[\text{M}+\text{NH}_4]^+$ , 100), 203 ( $[\text{M}+\text{H}]^+$ , 21); HRMS (Cl<sup>+</sup>) Found  $[\text{M}+\text{H}]^+$  203.1076  $\text{C}_{13}\text{H}_{15}\text{O}_2$ , requires 203.1072

### **Ethyl 4-(4-methoxyphenyl)-2-methyl-4-triethylsilylbuta-2,3-dienoate 6f and ethyl 4-(4-methoxyphenyl)-2-methyl-buta-2,3-dienoate 8f**

Carried out by the general procedure above with 2-(4-methoxyphenyl)-2-triethylsilylethen-1-one **1f** (0.118 g, 0.45 mmol) and (1-ethoxycarbonyl-ethylidene)triphenylphosphorane (**4**, 0.181 g, 0.66 mmol) in benzene (4 ml) at 50 °C. The crude product was purified by flash chromatography (90:10 petroleum ether:diethyl ether) to yield ethyl 4-(4-methoxyphenyl)-2-methyl-4-triethylsilylbuta-2,3-dienoate **6f** as a colourless liquid (0.068 g, 44 %) and ethyl 4-(4-methoxyphenyl)-2-methyl-buta-2,3-dienoate **8f** as a colourless liquid (0.003 g, 3 %).

**6f:**  $\nu_{\max}$  (KBr/film) 2955 s, 2910 m, 2875 m, 1924 s (C=C=C), 1703 s (C=O), 1605 m, 1509 s, 1462 m, 1367 w, 1286 s, 1264 s, 1246 s, 1174 m, 1117 s, 1035 m, 1006 m, 829 m, 735 m, 701 m  $\text{cm}^{-1}$ ;  $\delta_{\text{H}}$  (270 MHz,  $\text{CDCl}_3$ ) 0.70 (6 H, q,  $J = 8$  Hz,  $\text{SiCH}_2\text{CH}_3$ ), 0.94 (9 H, t,  $J = 8$  Hz,  $\text{SiCH}_2\text{CH}_3$ ), 1.22 (3 H, t,  $J = 7$  Hz,  $\text{CH}_2\text{CH}_3$ ), 1.88 (3 H, s,  $\text{CH}_3$ ), 3.78 (3 H, s,  $\text{OCH}_3$ ), 4.12 (1

H, dq,  $J = 11$  Hz,  $J = 7$  Hz,  $\underline{\text{CH}_2\text{CH}_3}$ ), 4.20 (1 H, dq,  $J = 11$  Hz,  $J = 7$  Hz,  $\underline{\text{CH}_2\text{CH}_3}$ ), 6.84 (2 H, d,  $J_{3'-2'} = 9$  Hz,  $\text{H}_{3'}$ ), 7.17 (2 H, d,  $J_{2'-3'} = 9$  Hz,  $\text{H}_{2'}$ );  $\delta_{\text{C}}$  (75 MHz,  $\text{CDCl}_3$ ) 3.6  $\text{Si}\underline{\text{CH}_2\text{CH}_3}$ , 7.1  $\text{SiCH}_2\underline{\text{CH}_3}$ , 14.3, 14.5  $\text{CH}_3$ ,  $\text{CH}_2\underline{\text{CH}_3}$ , 55.2  $\text{OCH}_3$ , 60.5  $\underline{\text{CH}_2\text{CH}_3}$ , 90.7  $\text{C}_2$ , 99.1  $\text{C}_4$ , 114.1  $\text{C}_3$ , 127.9  $\text{C}_1$ , 128.9  $\text{C}_2$ , 158.5  $\text{C}_4$ , 169.1  $\text{C}_1$ , 212.2  $\text{C}_3$ ;  $m/z$  ( $\text{CI}^+$ ,  $\text{NH}_3$ ) 364 ( $[\text{M}+\text{NH}_4]^+$ , 26), 347 ( $[\text{M}+\text{H}]^+$ , 100); HRMS ( $\text{CI}^+$ ) Found  $[\text{M}+\text{H}]^+$  347.2046  $\text{C}_{20}\text{H}_{31}\text{O}_3\text{Si}$ , requires 347.2042

### **Ehyl 4-(2-furyl)-2-methyl-4-triethylsilylbuta-2,3-dienoate 6h and ethyl 4-(2-furyl)-2-methylbuta-2,3-dienoate 8h**

Carried out by the general procedure above with 2-(2-furyl)-2-triethylsilylethen-1-one **1h** (0.132 g, 0.6 mmol) and (1-ethoxycarbonyl-ethylidene)triphenylphosphorane (**4**, 0.236 g, 0.5 mmol) in benzene (3 ml) at 50 °C. The crude product was purified by flash chromatography (90:10 petroleum ether:diethyl ether) to yield ethyl 4-(2-furyl)-2-methyl-4-triethylsilylbuta-2,3-dienoate **6h** as a colourless liquid (0.012 g, 7 %) and ethyl 4-(2-furyl)-2-methylbuta-2,3-dienoate **8h** as a colourless liquid (0.026 g, 23 %).

**6h**:  $\nu_{\text{max}}$  (KBr/film) 2957 s, 2912 m, 2877 s, 1926 s ( $\text{C}=\text{C}=\text{C}$ ), 1708 s ( $\text{C}=\text{O}$ ), 1462 m, 1368 m, 1265 s, 1118 s, 1019 s, 959 m, 859 w, 761 w, 735 s, 701 m  $\text{cm}^{-1}$ ;  $\delta_{\text{H}}$  (270 MHz,  $\text{CDCl}_3$ ) 0.73 (6 H, q,  $J = 8$  Hz,  $\text{Si}\underline{\text{CH}_2\text{CH}_3}$ ), 0.94 (9 H, t,  $J = 8$  Hz,  $\text{SiCH}_2\underline{\text{CH}_3}$ ), 1.20 (3 H, t,  $J = 7$  Hz,  $\underline{\text{CH}_2\text{CH}_3}$ ), 1.90 (3 H, s,  $\text{CH}_3$ ), 4.08 (1 H, dq,  $J = 11$  Hz,  $J = 7$  Hz,  $\underline{\text{CH}_2\text{CH}_3}$ ), 4.21 (1 H, dq,  $J = 11$  Hz,  $J = 7$  Hz,  $\underline{\text{CH}_2\text{CH}_3}$ ), 6.23 (1 H, dd,  $J_{3'-4'} = 3$  Hz,  $J_{3'-5'} = 0.5$  Hz,  $\text{H}_{3'}$ ), 6.36 (1 H, dd,  $J_{4'-3'} = 3$  Hz,  $J_{4'-5'} = 1.5$  Hz,  $\text{H}_{4'}$ ), 7.36 (1 H, dd,  $J_{5'-4'} = 1.5$  Hz,  $J_{5'-3'} = 0.5$  Hz,  $\text{H}_{5'}$ );  $\delta_{\text{C}}$  (75 MHz,  $\text{CDCl}_3$ ) 3.5  $\text{Si}\underline{\text{CH}_2\text{CH}_3}$ , 7.1  $\text{SiCH}_2\underline{\text{CH}_3}$ , 14.3, 14.6  $\text{CH}_3$ ,  $\text{CH}_2\underline{\text{CH}_3}$ , 60.7  $\underline{\text{CH}_2\text{CH}_3}$ , 91.1, 92.5  $\text{C}_{2,4}$ , 107.9, 111.3  $\text{C}_{3,4'}$ , 142.0  $\text{C}_5$ , 147.9  $\text{C}_2$ , 168.4  $\text{C}_1$ , 212.7  $\text{C}_3$ ;  $m/z$  ( $\text{CI}^+$ ,  $\text{NH}_3$ ) 324 ( $[\text{M}+\text{NH}_4]^+$ , 35), 307 ( $[\text{M}+\text{H}]^+$ , 100); HRMS ( $\text{CI}^+$ ) Found  $[\text{M}+\text{H}]^+$  307.1733  $\text{C}_{17}\text{H}_{27}\text{O}_3\text{Si}$ , requires 307.1729

**8h**:  $\nu_{\text{max}}$  (KBr/film) 2983 m, 2930 w, 2907 w, 1948 w ( $\text{C}=\text{C}=\text{C}$ ), 1711 s ( $\text{C}=\text{O}$ ), 1447 w, 1369 m, 1270 s, 1171 m, 1120 s, 1013 m, 926 m, 739 s  $\text{cm}^{-1}$ ;  $\delta_{\text{H}}$  (270 MHz,  $\text{CDCl}_3$ ) 1.24 (3 H, t,  $J = 7$  Hz,  $\underline{\text{CH}_2\text{CH}_3}$ ), 1.97 (3 H, d,  $J = 3$  Hz,  $\text{CH}_3$ ), 4.16 (1 H, dq,  $J = 11$  Hz,  $J = 7$  Hz,  $\underline{\text{CH}_2\text{CH}_3}$ ), 4.22 (1 H, dq,  $J = 11$  Hz,  $J = 7$  Hz,  $\underline{\text{CH}_2\text{CH}_3}$ ), 6.28 (1 H, d,  $J_{3'-4'} = 3$  Hz,  $\text{H}_{3'}$ ), 6.38 (1 H, dd,  $J_{4'-3'}$

$J_{3'} = 3$  Hz,  $J_{4'-5'} = 2$  Hz,  $H_{4'}$ ), 6.42 (1 H, q,  $J = 3$  Hz,  $H_{4'}$ ), 7.37 (1 H, dd,  $J_{5'-4'} = 2$  Hz,  $J_{5'-3'} = 0.5$  Hz,  $H_{5'}$ );  $\delta_C$  (75 MHz,  $CDCl_3$ ) 14.2, 15.4  $CH_3$ ,  $CH_2CH_3$ , 61.2  $CH_2CH_3$ , 87.9  $C_4$ , 100.1  $C_2$ , 108.9, 111.5  $C_{3',4'}$ , 142.7  $C_{5'}$ , 146.1  $C_2$ , 166.6  $C_1$ , 211.8  $C_3$ ;  $m/z$  (CI+,  $NH_3$ ) 193 ( $[M+H]^+$ , 100), 119 (80); HRMS (CI+) Found  $[M+H]^+$  193.0864  $C_{11}H_{13}O_3$ , requires 193.0865

### **Ethyl 2-methyl-4-(2-thiophenyl)-buta-2,3-dienoate 8i**

Carried out by the general procedure above with 2-(2-thiophenyl)-2-triethylsilylethen-1-one **1i** (0.036 g, 0.15 mmol) and (1-ethoxycarbonylethylidene)triphenylphosphorane (**4**, 0.060 g, 0.165 mmol) in DCM (1 ml) at rt. The crude product was purified by flash chromatography (90:10 petroleum ether:diethyl ether) to yield ethyl 2-methyl-4-(2-thiophenyl)-buta-2,3-dienoate **8i** as a colourless liquid (0.021 g, 67 %).

$\nu_{max}$  (KBr/film) 2983 m, 2930 w, 2907 w, 1948 w (C=C=C), 1711 s (C=O), 1447 w, 1369 m, 1270 s, 1171 m, 1120 s, 1013 m, 926 m, 739  $s\text{ cm}^{-1}$ ;  $\delta_H$  (270 MHz,  $CDCl_3$ ) 1.24 (3 H, t,  $J = 7$  Hz,  $CH_2CH_3$ ), 1.97 (3 H, d,  $J = 3$  Hz,  $CH_3$ ), 4.19 (2 H, app dq,  $J_{a-b} = 16$  Hz,  $J = 7$  Hz,  $CH_2CH_3$ ), 6.28 (1 H, d,  $J_{3'-4'} = 3$  Hz,  $H_{3'}$ ), 6.38 (1 H, dd,  $J_{4'-3'} = 3$  Hz,  $J_{4'-5'} = 2$  Hz,  $H_{4'}$ ), 6.42 (1 H, q,  $J = 3$  Hz,  $H_{4'}$ ), 7.37 (1 H, dd,  $J_{5'-4'} = 2$  Hz,  $J_{5'-3'} = 0.5$  Hz,  $H_{5'}$ );  $\delta_C$  (75 MHz,  $CDCl_3$ ) 14.2, 15.4  $CH_3$ ,  $CH_2CH_3$ , 61.2  $CH_2CH_3$ , 87.9  $C_4$ , 100.1  $C_2$ , 108.9, 111.5  $C_{3',4'}$ , 142.7  $C_{5'}$ , 146.1  $C_2$ , 166.6  $C_1$ , 211.8  $C_3$ ;  $m/z$  (CI+,  $NH_3$ ) 193 ( $[M+H]^+$ , 100), 119 (80); HRMS (CI+) Found  $[M+H]^+$  193.0864  $C_{11}H_{13}O_3$ , requires 193.0865

### **Ethyl 4-(2-thiophenyl)-4-triethylsilylbuta-2,3-dienoate 7i**

Carried out by the general procedure above with 2-(2-thiophenyl)-2-triethylsilylethen-1-one **1i** (0.036 g, 0.15 mmol) and (ethoxycarbonylmethylene)triphenylphosphorane (**5**, 0.058 g, 0.165 mmol) in DCM (1 ml) at rt. The crude product was purified by flash chromatography (90:10 petroleum ether:diethyl ether) to yield ethyl 4-(2-thiophenyl)-4-triethylsilylbuta-2,3-dienoate **7i** as a colourless liquid (0.045 g, 98 %).

$\nu_{max}$  (KBr/film) 2983 m, 2930 w, 2907 w, 1948 w (C=C=C), 1711 s (C=O), 1447 w, 1369 m, 1270 s, 1171 m, 1120 s, 1013 m, 926 m, 739  $s\text{ cm}^{-1}$ ;  $\delta_H$  (300 MHz,  $CDCl_3$ ) 0.78 (6 H, q,  $J = 8$

Hz, SiCH<sub>2</sub>CH<sub>3</sub>), 0.97 (9 H, t,  $J = 8$  Hz, SiCH<sub>2</sub>CH<sub>3</sub>), 1.23 (3 H, t,  $J = 7$  Hz, CH<sub>2</sub>CH<sub>3</sub>), 4.17 (2 H, app dq,  $J_{a-b} = 16$  Hz,  $J = 7$  Hz, CH<sub>2</sub>CH<sub>3</sub>), 5.57 (1 H, s, H<sub>2</sub>), 6.92-6.97 (2 H, m, H<sub>3,4'</sub>), 7.20 (1 H, dd,  $J_{5'-4'} = 5$  Hz,  $J_{5'-3'} = 1.5$  Hz, H<sub>5'</sub>);  $\delta_C$  (75 MHz, CDCl<sub>3</sub>) 3.5 SiCH<sub>2</sub>CH<sub>3</sub>, 7.1 SiCH<sub>2</sub>CH<sub>3</sub>, 14.2 CH<sub>2</sub>CH<sub>3</sub>, 60.7 CH<sub>2</sub>CH<sub>3</sub>, 84.5 C<sub>2</sub>, 95.3 C<sub>4</sub>, 125.4 C<sub>3,4'</sub> (2 peaks), 127.3 C<sub>5'</sub>, 136.2 C<sub>2'</sub>, 166.5 C=O, 213.1 C<sub>3</sub>;  $m/z$  (CI+, NH<sub>3</sub>) 326 ([M+NH<sub>4</sub>]<sup>+</sup>, 17), 309 ([M+H]<sup>+</sup>, 100), 148 (41); HRMS (CI+) Found [M+H]<sup>+</sup> 309.1341 C<sub>16</sub>H<sub>25</sub>O<sub>2</sub>SSi, requires 309.1345

**Ethyl 2-methyl-4-(3-(1-tert-butoxycarbonyl)indolyl)-4-triethylsilyl buta-2,3-dienoate 6j and ethyl 2-methyl-4-(3-(1-tert-butoxycarbonyl)indolyl)-4-triethylsilylbuta-2,3-dienoate 8j**

Carried out by the general procedure above with 2-(3-(1-tert-butoxycarbonyl)indolyl)-2-triethylsilylethen-1-one **1j** (0.074 g, 0.2 mmol) and (1-ethoxycarbonylethylidene)triphenylphosphorane (0.087 g, 0.24 mmol) in refluxing benzene (2 ml). The crude product was purified by flash chromatography (90:10 petroleum ether:diethyl ether) to yield ethyl 2-methyl-4-(3-(1-tert-butoxycarbonyl)indolyl)-4-triethylsilylbuta-2,3-dienoate **6j** as a colourless liquid (0.067 g, 74 %) and ethyl 2-methyl-4-(3-(1-tert-butoxycarbonyl)indolyl)-buta-2,3-dienoate **8j** as a colourless liquid (0.013 g, 19 %).

**6j**:  $\nu_{max}$  (KBr/film) 2954 m, 2875 w, 1918 m (C=C=C), 1735 s (C=O Boc), 1706 s (C=O ester), 1452 m, 1376 s, 1251 s, 1157 s, 1118 m, 1093 m, 1022 w, 858 w, 763 w, 746 w cm<sup>-1</sup>;  $\delta_H$  (300 MHz, CDCl<sub>3</sub>) 0.77 (6 H, q,  $J = 8$  Hz, SiCH<sub>2</sub>CH<sub>3</sub>), 0.98 (9 H, t,  $J = 8$  Hz, SiCH<sub>2</sub>CH<sub>3</sub>), 1.25 (3 H, t,  $J = 7$  Hz, CH<sub>2</sub>CH<sub>3</sub>), 1.67 (9 H, s, C(CH<sub>3</sub>)), 1.96 (3 H, s, CH<sub>3</sub>), 4.22 (1 H, dq,  $J = 11$  Hz,  $J = 7$  Hz, CH<sub>2</sub>CH<sub>3</sub>), 4.28 (1 H, dq,  $J = 11$  Hz,  $J = 7$  Hz, CH<sub>2</sub>CH<sub>3</sub>), 7.22 (1 H, appar t,  $J = 8$  Hz, *IndH*), 7.32 (1 H, appar t,  $J = 8$  Hz, *IndH*), 7.52 (1 H, s, H<sub>2</sub>), 7.83 (1 H, d,  $J = 8$  Hz, *IndH*), 8.08 (1 H, br d, *IndH*);  $\delta_C$  (75 MHz, CDCl<sub>3</sub>) 3.5 SiCH<sub>2</sub>CH<sub>3</sub>, 7.2 SiCH<sub>2</sub>CH<sub>3</sub>, 14.3, 15.0 CH<sub>3</sub>, CH<sub>2</sub>CH<sub>3</sub>, 27.9 C(CH<sub>3</sub>), 60.7 CH<sub>2</sub>CH<sub>3</sub>, 83.9 C(CH<sub>3</sub>), 90.7, 90.9 C<sub>2,4</sub>, 115.0, 120.5, 122.8, 122.9, 124.7 C<sub>2',4',5',6',7'</sub>, 114.2, 130.0, 135.1 C<sub>3',3a',7a'</sub>, 149.7 C=O, Boc, 169.3 C<sub>1</sub>, 212.3 C<sub>3</sub>;  $m/z$  (CI+, NH<sub>3</sub>) 473 ([M+NH<sub>4</sub>]<sup>+</sup>, 25), 456 ([M+H]<sup>+</sup>, 100), 399 (24), 356 (18), 218 (20); HRMS (CI+) Found [M+H]<sup>+</sup> 456.2567 C<sub>26</sub>H<sub>38</sub>NO<sub>4</sub>Si, requires 456.2570

**8j:**  $\nu_{\max}$  (KBr/film) 2979 w, 2933 w, 1945 w (C=C=C), 1735 s (C=O Boc), 1710 s (C=O ester), 1452 m, 1371 m, 1348 s, 1303 w, 1253 s, 1157 s, 1118 m, 1089 s, 1020 w, 763 w, 748 w  $\text{cm}^{-1}$ ;  $\delta_{\text{H}}$  (300 MHz,  $\text{CDCl}_3$ ) 1.21 (3 H, t,  $J = 7$  Hz,  $\text{CH}_2\text{CH}_3$ ), 1.65 (9 H, s,  $\text{C}(\text{CH}_3)$ ), 2.04 (3 H, d,  $J_{\text{CH}_3-4} = 3$  Hz,  $\text{CH}_3$ ), 4.20 (2 H, q,  $J = 7$  Hz,  $\text{CH}_2\text{CH}_3$ ), 6.64 (1 H, q,  $J_{4-\text{CH}_3} = 3$  Hz,  $\text{H}_4$ ), 7.23 (1 H, appar t,  $J = 8$  Hz, *IndH*), 7.33 (1 H, appar t,  $J = 8$  Hz, *IndH*), 7.57 (1 H, s,  $\text{H}_2$ ), 7.68 (1 H, d,  $J = 8$  Hz, *IndH*), 8.13 (1 H, br d, *IndH*);  $\delta_{\text{C}}$  (75 MHz,  $\text{CDCl}_3$ ) 14.3, 15.7  $\text{CH}_3$ ,  $\text{CH}_2\text{CH}_3$ , 28.2  $\text{C}(\text{CH}_3)$ , 61.2  $\text{CH}_2\text{CH}_3$ , 84.0  $\text{C}(\text{CH}_3)$ , 88.5  $\text{C}_4$ , 98.6  $\text{C}_2$ , 115.3, 119.9, 123.0, 124.3, 124.9  $\text{C}_{2,4,5,6,7}$ , 112.3, 128.6, 135.9  $\text{C}_{3,3a,7a}$ , 149.4 (C=O, Boc), 167.2  $\text{C}_1$ , 213.1  $\text{C}_3$ ;  $m/z$  ( $\text{Cl}^+$ ,  $\text{NH}_3$ ) 359 ( $[\text{M}+\text{NH}_4]^+$ , 25), 342 ( $[\text{M}+\text{H}]^+$ , 100), 242 (77), 218 (88), 120 (24); HRMS ( $\text{Cl}^+$ ) Found  $[\text{M}+\text{H}]^+$  342.1704  $\text{C}_{20}\text{H}_{24}\text{NO}_4$ , requires 342.1705

#### 4-Triethylsilylpenta-2,3-dienynitrile **14a**

Carried out by the general procedure above with 2-triethylsilylpropen-2-one **1a** (0.102 g, 0.60 mmol) and (cyanomethylene)triphenylphosphorane (**9**, 0.2 g, 0.66 mmol) in DCM (2 ml) at rt. The crude product was purified by flash chromatography (95:5 petroleum ether:diethyl ether) to yield 4-triethylsilylpenta-2,3-dienynitrile **14a** as a colourless liquid (0.061 g, 53 %).

$\nu_{\max}$  (KBr/film) 3012 w, 2956 s, 2912 m, 2877 s, 2218 s (CN), 1934 s (C=C=C), 1457 w, 1414 w, 1238 w, 1004 m, 739 s, 721 s, 710  $\text{s cm}^{-1}$ ;  $\delta_{\text{H}}$  (300 MHz,  $\text{CDCl}_3$ ) 0.64 (6 H, q,  $J = 8$  Hz,  $\text{SiCH}_2\text{CH}_3$ ), 0.93 (9 H, t,  $J = 8$  Hz,  $\text{SiCH}_2\text{CH}_3$ ), 1.76 (3 H, d,  $J_{5-2} = 3$  Hz,  $\text{H}_5$ ), 4.74 (1 H, q,  $J_{2-5} = 3$  Hz,  $\text{H}_2$ );  $\delta_{\text{C}}$  (75 MHz,  $\text{CDCl}_3$ ) 2.5  $\text{SiCH}_2\text{CH}_3$ , 7.0  $\text{SiCH}_2\text{CH}_3$ , 14.3  $\text{C}_5$ , 59.3  $\text{C}_2$ , 94.2  $\text{C}_4$ , 115.2 CN, 210.5  $\text{C}_3$ ;  $m/z$  ( $\text{Cl}^+$ ,  $\text{NH}_3$ ) 211 ( $[\text{M}+\text{NH}_4]^+$ , 100); HRMS ( $\text{Cl}^+$ ) Found  $[\text{M}+\text{NH}_4]^+$  211.1627  $\text{C}_{11}\text{H}_{23}\text{N}_2\text{Si}$ , requires 211.1630

#### 4-Triethylsilylundeca-2,3-dienenitrile **14b**

Carried out by the general procedure above with 2-triethylsilylnon-1-en-1-one **1b** (0.050 g, 0.2 mmol) and (cyanomethylene)triphenylphosphorane (**9**, 0.066 g, 0.22 mmol) in DCM (2 ml) at rt. The crude product was purified by flash chromatography (95:5 petroleum ether:diethyl

ether) to yield 4-triethylsilylundeca-2,3-diene nitrile **14b** as a colourless liquid (0.052 g, 94 %).

$\nu_{\max}$  (KBr/film) 2955 s, 2929 s, 2874 s, 2857 s, 2217 w (CN), 1931 w (C=C=C), 1728 m, 1650 w, 1465 w, 1244 w, 1017 w, 737 m, 721 m  $\text{cm}^{-1}$ ;  $\delta_{\text{H}}$  (300 MHz,  $\text{CDCl}_3$ ) 0.65 (6 H, q,  $J = 8$  Hz,  $\text{SiCH}_2\text{CH}_3$ ), 0.86 (3H, t,  $J = 7$  Hz,  $\text{H}_{11}$ ), 0.94 (9 H, t,  $J = 8$  Hz,  $\text{SiCH}_2\text{CH}_3$ ), 1.16-1.30 (8 H, m,  $\text{H}_{7,8,9,10}$ ), 1.46 (2 H, p,  $J = 7.5$  Hz,  $\text{H}_6$ ), 2.01 (2 H, m,  $\text{H}_5$ ), 4.80 (1 H, t,  $J_{2-5} = 3.5$  Hz,  $\text{H}_2$ );  $\delta_{\text{C}}$  (75 MHz,  $\text{CDCl}_3$ ) 2.8  $\text{SiCH}_2\text{CH}_3$ , 7.0  $\text{SiCH}_2\text{CH}_3$ , 14.0  $\text{C}_{11}$ , 22.6  $\text{C}_{10}$ , 28.5, 28.7, 29.0, 29.2  $\text{C}_{6,7,8,9}$ , 31.7  $\text{C}_5$ , 60.8  $\text{C}_2$ , 99.8  $\text{C}_4$ , 115.4  $\text{C}_1$ , 210.2  $\text{C}_3$ ;  $m/z$  ( $\text{Cl}^+$ ,  $\text{NH}_3$ ) 295 ( $[\text{M}+\text{NH}_4]^+$ , 100), 131 (28), 103 (27); HRMS ( $\text{Cl}^+$ ) Found  $[\text{M}+\text{NH}_4]^+$  295.2565  $\text{C}_{17}\text{H}_{35}\text{N}_2\text{Si}$ , requires 295.2569

### 5-Triethylsilylhexa-3,4-dien-2-one **15a**

Carried out by the general procedure above with 2-triethylsilylpropen-2-one **1a** (0.102 g, 0.6 mmol) and acetylmethylenetriphenylphosphorane (**10**, 0.21 g, 0.66 mmol) in DCM (2 ml) at rt. The crude product was purified by flash chromatography (90:10 petroleum ether:diethyl ether) to yield 5-triethylsilylhexa-3,4-dien-2-one **15a** as a colourless liquid (0.065 g, 52 %).

$\nu_{\max}$  (KBr/film) 2955 s, 2912 m, 2876 s, 1919 s (C=C=C), 1677 s (C=O), 1456 w, 1415 w, 1356 w, 1231 s, 1007 m, 939 w, 795 w, 737 m, 722 m, 711 m  $\text{cm}^{-1}$ ;  $\delta_{\text{H}}$  (270 MHz,  $\text{CDCl}_3$ ) 0.64 (6 H, q,  $J = 8$  Hz,  $\text{SiCH}_2\text{CH}_3$ ), 0.93 (9 H, t,  $J = 8$  Hz,  $\text{SiCH}_2\text{CH}_3$ ), 1.80 (3 H, d,  $J_{6-3} = 3$  Hz,  $\text{H}_6$ ), 2.15 (3 H, s,  $\text{H}_1$ ), 5.38 (1 H, q,  $J_{3-6} = 3$  Hz,  $\text{H}_3$ );  $\delta_{\text{C}}$  (75 MHz,  $\text{CDCl}_3$ ) 2.7  $\text{SiCH}_2\text{CH}_3$ , 7.1  $\text{SiCH}_2\text{CH}_3$ , 14.6  $\text{CH}_3$ , 26.3  $\text{C}_1$ , 92.0  $\text{C}_3$ , 93.0  $\text{C}_5$ , 200.4 C=O, 210.5  $\text{C}_4$ ;  $m/z$  ( $\text{Cl}^+$ ,  $\text{NH}_3$ ) 228 ( $[\text{M}+\text{NH}_4]^+$ , 17), 211 ( $[\text{M}+\text{H}]^+$ , 100); HRMS ( $\text{Cl}^+$ ) Found  $[\text{M}+\text{H}]^+$  211.1526  $\text{C}_{12}\text{H}_{23}\text{OSi}$ , requires 211.1518

### 1-Phenyl-4-triethylsilylpenta-2,3-dien-1-one **16a**

Carried out by the general procedure above with 2-triethylsilylpropen-2-one **1a** (0.073 g, 0.43 mmol) and benzoylmethylenetriphenylphosphorane (**11**, 0.18 g, 0.47 mmol) in refluxing DCM (2 ml). The crude product was purified by flash chromatography (90:10 petroleum

ether:diethyl ether) to yield 1-phenyl-4-triethylsilylpenta-2,3-dien-1-one **16a** as a colourless liquid (0.073 g, 62 %).

$\nu_{\max}$  (KBr/film) 2956 s, 2911 m, 2876 m, 1918 s (C=C=C), 1647 s (C=O), 1447 w, 1389 w, 1275 m, 1219 m, 1062 w, 1007 m, 710 m  $\text{cm}^{-1}$ ;  $\delta_{\text{H}}$  (270 MHz,  $\text{CDCl}_3$ ) 0.54 (6 H, q,  $J = 8$  Hz,  $\text{SiCH}_2\text{CH}_3$ ), 0.81 (9 H, t,  $J = 8$  Hz,  $\text{SiCH}_2\text{CH}_3$ ), 1.83 (3 H, d,  $J_{5-2} = 3$  Hz,  $\text{H}_5$ ), 5.97 (1 H, q,  $J_{2-5} = 3$  Hz,  $\text{H}_3$ ), 7.35-7.51 (3 H, m,  $\text{H}_{3',4'}$ ), 7.75-7.79 (2 H, m,  $\text{H}_2$ );  $\delta_{\text{C}}$  (75 MHz,  $\text{CDCl}_3$ ) 2.6  $\text{SiCH}_2\text{CH}_3$ , 6.9  $\text{SiCH}_2\text{CH}_3$ , 14.4  $\text{C}_5$ , 88.2  $\text{C}_2$ , 91.6  $\text{C}_4$ , 128.0, 128.1  $\text{C}_{2',3'}$ , 131.9  $\text{C}_{4'}$ , 138.5  $\text{C}_{1'}$ , 194.4 C=O, 210.8  $\text{C}_3$ ;  $m/z$  ( $\text{Cl}^+$ ,  $\text{NH}_3$ ) 273 ( $[\text{M}+\text{H}]^+$ , 100); HRMS ( $\text{Cl}^+$ ) Found  $[\text{M}+\text{H}]^+$  273.1667  $\text{C}_{17}\text{H}_{25}\text{OSi}$ , requires 273.1675

### 1-Phenyl-4-triethylsilylundeca-2,3-dien-1-one **16b**

Carried out by the general procedure above with 2-triethylsilylnon-1-en-1-one **1b** (0.382 g, 1.5 mmol) and benzoylmethylenetriphenylphosphorane (**11**, 0.628 g, 1.65 mmol) in refluxing DCM (5 ml). The crude product was purified by flash chromatography (90:10 petroleum ether:diethyl ether) to yield 1-phenyl-4-triethylsilylundeca-2,3-dien-1-one **16b** as a colourless liquid (0.333 g, 62 %).

$\nu_{\max}$  (KBr/film) 2954 s, 2927 s, 2875 m, 1914 s (C=C=C), 1644 s (C=O), 1390 w, 1276 m, 1218 m, 1004 m, 971 w, 842 w, 721 m, 696 m  $\text{cm}^{-1}$ ;  $\delta_{\text{H}}$  (300 MHz,  $\text{CDCl}_3$ ) 0.57 (6 H, q,  $J = 8$  Hz,  $\text{SiCH}_2\text{CH}_3$ ), 0.84 (12 H, t,  $J = 8$  Hz,  $\text{SiCH}_2\text{CH}_3$ ,  $\text{H}_{11}$ ), 1.22-1.32 (8 H, m,  $\text{H}_{7,8,9,10}$ ), 1.52 (2 H, p,  $J = 7.5$  Hz,  $\text{H}_6$ ), 1.94-2.18 (2 H, m,  $\text{H}_5$ ), 6.10 (1 H, t,  $J_{2-5} = 3.5$  Hz,  $\text{H}_2$ ), 7.35-7.47 (3 H, m,  $\text{H}_{3',4'}$ ), 7.79-7.82 (2 H, m,  $\text{H}_2$ );  $\delta_{\text{C}}$  (75 MHz,  $\text{CDCl}_3$ ) 2.9  $\text{SiCH}_2\text{CH}_3$ , 7.0  $\text{SiCH}_2\text{CH}_3$ , 14.1  $\text{C}_{11}$ , 22.6  $\text{C}_{10}$ , 28.9, 29.0, 29.1, 29.3  $\text{C}_{6,7,8,9}$ , 31.7  $\text{C}_5$ , 89.5  $\text{C}_2$ , 97.0  $\text{C}_4$ , 128.1  $\text{C}_{2',3'}$  (2 peaks overlapped), 131.9  $\text{C}_{4'}$ , 138.6  $\text{C}_{1'}$ , 193.6  $\text{C}_1$ , 210.0  $\text{C}_3$ ;  $m/z$  ( $\text{Cl}^+$ ,  $\text{NH}_3$ ) 357 ( $[\text{M}+\text{H}]^+$ , 100); HRMS ( $\text{Cl}^+$ ) Found  $[\text{M}+\text{H}]^+$  357.2614  $\text{C}_{23}\text{H}_{37}\text{OSi}$ , requires 357.2614

**General procedure for the preparation of allenylsilanes from silyl ketenes and semi-stabilised phosphorus ylides**

### 3-Methyl-1-phenyl-3-triethylsilylbuta-1,2-diene **17a**

To a suspension of benzyltriphenylphosphonium chloride (0.238 g, 0.55 mmol) in THF (2 ml) at rt was added dropwise *n*-BuLi (0.275 ml of a 2 M solution in pentane, 0.55 mmol). The resulting red-orange solution was stirred at rt for 0.5 h and then a solution of 2-triethylsilylpropen-2-one **1a** (0.085 g, 0.5 mmol) in THF (2ml) was added dropwise. After 30 min, hexane (10 ml) was then added and the white precipitate removed by filtration. The filtrate was concentrated under reduced pressure and the residual oil purified by flash chromatography (100 % petroleum ether) to yield 3-methyl-1-phenyl-3-triethylsilylbuta-1,2-diene **17a** as a colourless liquid (0.079 g, 65 %).

$\nu_{\max}$  (KBr/film) 3029 w, 2953 s, 2911 m, 2874 s, 1923 s (C=C=C), 1598 w, 1496 w, 1456 m, 1414 w, 1238 w, 1009 m, 931 w, 797 m, 737 s, 711 s, 692 s  $\text{cm}^{-1}$ ;  $\delta_{\text{H}}$  (270 MHz,  $\text{CDCl}_3$ ) 0.70 (6 H, q,  $J = 8$  Hz,  $\text{SiCH}_2\text{CH}_3$ ), 1.02 (9 H, t,  $J = 8$  Hz,  $\text{SiCH}_2\text{CH}_3$ ), 1.85 (3 H, d,  $J_{4-1} = 3$  Hz,  $\text{H}_4$ ), 5.84 (1 H, q,  $J_{1-4} = 3$  Hz,  $\text{H}_1$ ), 7.12-7.18 (1 H, m,  $\text{H}_4'$ ), 7.24-7.33 (4 H, m,  $\text{H}_{2',3'}$ );  $\delta_{\text{C}}$  (75 MHz,  $\text{CDCl}_3$ ) 3.0  $\text{SiCH}_2\text{CH}_3$ , 7.4  $\text{SiCH}_2\text{CH}_3$ , 15.8  $\text{C}_4$ , 88.0  $\text{C}_3$ , 92.6  $\text{C}_1$ , 125.7  $\text{C}_{4'}$ , 125.9, 128.4  $\text{C}_{2',3'}$ , 136.1  $\text{C}_{1'}$ , 206.4  $\text{C}_2$ ;  $m/z$  ( $\text{Cl}^+$ ,  $\text{NH}_3$ ) 245 ( $[\text{M}+\text{H}]^+$ , 41), 132 ( $[\text{SiEt}_3+\text{NH}_3]^+$ , 100); HRMS ( $\text{Cl}^+$ ) Found  $[\text{M}+\text{H}]^+$  245.1717  $\text{C}_{16}\text{H}_{25}\text{Si}$ , requires 245.1725

### 1-Phenyl-3-triethylsilyldeca-1,2-diene **17b**

Carried out by the general procedure above with 2-triethylsilylnon-1-en-1-one **1b** (0.509 g, 2 mmol), benzyltriphenylphosphonium chloride (0.953 g, 2.2 mmol) in THF (15 ml) and *n*-BuLi (1.15 ml of a 2 M solution in pentane, 2.3 mmol). The crude product was purified by flash chromatography (100 % petroleum ether) to yield 1-phenyl-3-triethylsilyldeca-1,2-diene **17b** as a colourless liquid (0.445 g, 68 %).

$\nu_{\max}$  (KBr/film) 3028 w, 2953 s, 2927 s, 2873 m, 2854 m, 1918 s (C=C=C), 1599 w, 1495 w, 1456 m, 1414 w, 1377 w, 1005 m, 797 m, 735 s, 718 s, 692 s  $\text{cm}^{-1}$ ;  $\delta_{\text{H}}$  (300 MHz,  $\text{CDCl}_3$ ) 0.61 (6 H, q,  $J = 8$  Hz,  $\text{SiCH}_2\text{CH}_3$ ), 0.82 (3 H, t,  $J_{10-9} = 7$  Hz,  $\text{H}_{10}$ ), 0.93 (9 H, t,  $J = 8$  Hz,  $\text{SiCH}_2\text{CH}_3$ ), 1.19-1.31 (8 H, m,  $\text{H}_{6,7,8,9}$ ), 1.49 (2 H, p,  $J = 7.5$  Hz,  $\text{H}_5$ ), 1.99-2.05 (2 H, m,  $\text{H}_4$ ), 5.83 (1 H, t,  $J_{1-4} = 3.5$  Hz,  $\text{H}_1$ ), 7.10 (1 H, m,  $\text{H}_4'$ ), 7.19-7.27 (4 H, m,  $\text{H}_{2',3'}$ );  $\delta_{\text{C}}$  (75 MHz,  $\text{CDCl}_3$ ) 3.2  $\text{SiCH}_2\text{CH}_3$ , 7.4  $\text{SiCH}_2\text{CH}_3$ , 14.1  $\text{C}_{10}$ , 22.6, 27.0, 29.2, 29.5, 29.7  $\text{C}_{5,6,7,8}$ , 31.9  $\text{C}_4$ ,

89.7 C<sub>1</sub>, 98.3 C<sub>3</sub>, 125.6 C<sub>4</sub>, 125.8, 128.4 C<sub>2,3</sub>, 136.4 C<sub>1</sub>, 205.8 C<sub>2</sub>; *m/z* (Cl<sup>+</sup>, NH<sub>3</sub>) 358 ([M+NH<sub>4</sub>]<sup>+</sup>, 10), 329 ([M+H]<sup>+</sup>, 31), 132 ([SiEt<sub>3</sub>+NH<sub>3</sub>]<sup>+</sup>, 100); HRMS (Cl<sup>+</sup>) Found [M+H]<sup>+</sup> 329.2657 C<sub>22</sub>H<sub>37</sub>Si, requires 329.2665

### 3-(4-Bromophenyl)-1-phenyl-3-triethylsilylpropa-1,2-diene **18g**

Carried out by the general procedure above with 2-triethylsilylnon-1-en-1-one **1g** (0.109 g, 0.35 mmol), benzyltriphenylphosphonium chloride (0.167 g, 0.385 mmol) in THF (2 ml) and *n*-BuLi (0.16 ml of a 2.5 M solution in pentane, 0.402 mmol). The crude product was purified by flash chromatography (100 % petroleum ether) to yield 3-(4-bromophenyl)-1-phenyl-3-triethylsilylpropa-1,2-diene **18g** as a colourless liquid (0.078 g, 58%).

$\nu_{\max}$  (KBr/film) 3027 w, 2954 s, 2910 s, 2873 s, 1913 s (C=C=C), 1598 w, 1483 s, 1456 m, 1413 w, 1375 w, 1238 w, 1072 m, 1008 s, 896 m, 825 m, 802 m, 734 s, 719r s cm<sup>-1</sup>;  $\delta_{\text{H}}$  (300 MHz, CDCl<sub>3</sub>) 0.83 (6 H, q, *J* = 8 Hz, SiCH<sub>2</sub>CH<sub>3</sub>), 1.00 (9 H, t, *J* = 8 Hz, SiCH<sub>2</sub>CH<sub>3</sub>), 6.24 (1 H, s, H<sub>1</sub>), 7.25 (3 H, m, inc. d, *J* = 8.5 Hz, H<sub>2'</sub>, H<sub>4'</sub>), 7.33 (4 H, m, H<sub>2,3'</sub>), 7.45 (2H, d, *J* = 8.5 Hz, H<sub>3'</sub>);  $\delta_{\text{C}}$  (75 MHz, CDCl<sub>3</sub>) 4.0 SiCH<sub>2</sub>CH<sub>3</sub>, 7.5 SiCH<sub>2</sub>CH<sub>3</sub>, 91.5 C<sub>1</sub>, 101.0, 120.5, 126.3, 126.6, 128.8, 129.3, 131.7, 134.4, 136.63 (8 x ArC), 210.4 C<sub>2</sub>; *m/z* (Cl<sup>+</sup>, NH<sub>3</sub>) 387 ([<sup>81</sup>BrM+H]<sup>+</sup>, 35), 385 ([<sup>79</sup>BrM+H]<sup>+</sup>, 35), 307 (37), 132 ([SiEt<sub>3</sub>+NH<sub>3</sub>]<sup>+</sup>, 100); HRMS (Cl<sup>+</sup>) Found [M+H]<sup>+</sup> 387.0967 C<sub>21</sub>H<sub>26</sub><sup>81</sup>BrSi, requires 387.0967

### 1-(4-Bromophenyl)-3-triethylsilyldeca-1,2-diene **18b**

Carried out by the general procedure above with 2-triethylsilylnon-1-en-1-one **1b** (0.051 g, 0.2 mmol), (4-bromobenzyl)triphenylphosphonium chloride (0.107 g, 0.21 mmol) in THF (15 ml) and lithium hexamethyldisilazide (0.22 ml of a 1 M solution in THF, 2.2 mmol). The crude product was purified by flash chromatography (100 % petroleum ether) to yield 3-(4-bromophenyl)-1-phenyl-3-triethylsilyldeca-1,2-diene **18b** as a colourless liquid (0.043 g, 53 %).

$\nu_{\max}$  (KBr/film) 2952 s, 2927 s, 2873 s, 2854 m, 1916 s (C=C=C), 1486 m, 1461 w, 1417 w, 1070 w, 1008 m, 833 m, 732 s, 719 s cm<sup>-1</sup>;  $\delta_{\text{H}}$  (270 MHz, CDCl<sub>3</sub>) 0.61 (6 H, q, *J* = 8 Hz), 0.83

(3 H, t,  $J_{10-9} = 7$  Hz), 0.93 (9 H, t,  $J = 8$  Hz), 1.18-1.31 (8 H, m), 1.42-1.51 (2 H, m), 1.99-2.07 (2 H, m), 5.77 (1 H, t,  $J_{1-4} = 3.5$  Hz), 7.06 (2 H, d,  $J_{3'-2'}$  = 8.5 Hz), 7.35 (2 H, d,  $J_{2'-3'}$  = 8.5 Hz);  $\delta_C$  (67.5 MHz,  $CDCl_3$ ) 3.2, 7.4, 14.1, 22.6, 29.1 (2 peaks overlapped), 29.5, 29.6, 31.8, 88.9, 98.9, 118.9, 127.3, 131.5, 135.5, 205.6;  $m/z$  (CI+,  $NH_3$ ) 409 ( $[M^{81}Br+H]^+$ , 43), 407 ( $[M^{79}Br+H]^+$ , 40), 329 ( $[M-Br+H]^+$ , 40), 193 (69), 132 ( $[SiEt_3+NH_3]^+$ , 100); HRMS (CI+) Found  $[M+H]^+$  409.1756  $C_{22}H_{36}^{81}BrSi$ , requires 409.1749

**General procedure for the preparation of allenylsilanes from silylketenes and  $Cp_2TiMe_2$**

**Ethyl 4-triethylsilylundeca-2,3-diene **19b****

A solution of  $Cp_2TiMe_2$  (4 ml of a 0.5M solution in THF, 2 mmol) was mixed with 2-triethylsilylnon-1-en-1-one **1b** (0.255 g, 1 mmol). The resulting solution was protected from light and stirred at 65-70 °C with exclusion of moisture and the reaction monitored by TLC for complete consumption of the silylketene. The solution was cooled to rt and diluted with petroleum ether. The resulting precipitate was removed by filtration, the filtrate concentrated under reduced pressure and the residual oil purified by flash chromatography (100 % petroleum ether) to yield 4-triethylsilylundeca-2,3-diene **19b** as a colourless liquid (0.197 g, 78 %).

$\nu_{max}$  (KBr/film) 2954 s, 2925 s, 2875 s, 2956 m, 1926 s (C=C=C), 1461 m, 1415 w, 1376 w, 1008 m, 808 m, 719 s  $cm^{-1}$ ;  $\delta_H$  (300 MHz,  $CDCl_3$ ) 0.62 (6 H, q,  $J = 8$  Hz,  $SiCH_2CH_3$ ), 0.84-0.97 (12 H, m,  $SiCH_2CH_3$ ,  $H_{10}$ ), 1.17-1.24 (8 H, m,  $H_{6,7,8,9}$ ), 1.41 (2 H, p,  $J = 7.5$  Hz,  $H_5$ ), 1.83-1.89 (2 H, m,  $H_4$ ), 4.28 (2 H, t,  $J_{1-4} = 3.5$  Hz,  $H_1$ );  $\delta_C$  (75 MHz,  $CDCl_3$ ) 3.1  $SiCH_2CH_3$ , 7.3  $SiCH_2CH_3$ , 14.1  $C_{10}$ , 22.7, 28.9 (2 peaks overlapped), 29.0, 29.4  $C_{5,6,7,8,9}$ , 31.9  $C_4$ , 68.5  $C_1$ , 91.6  $C_3$ , 208.9  $C_2$ ;  $m/z$  (CI+,  $NH_3$ ) 253 ( $[M+H]^+$ , 17), 132 ( $[SiEt_3+NH_3]^+$ , 100), 119 (40), 105 (27); HRMS (CI+) Found  $[M+H]^+$  253.2350  $C_{16}H_{33}Si$ , requires 253.2352

**3-tert-Butyldimethylsilyldeca-1,2-diene **19b\*****

Carried out by the general procedure above with  $\text{Cp}_2\text{TiMe}_2$  (0.6 ml, 0.3 mmol) and 2-*tert*-butyldimethylsilylnon-2-en-1-one **1b\*** (0.038 g, 0.15 mmol). The crude product was purified by flash chromatography (100 % petroleum ether) to yield 3-*tert*-butyldimethylsilyldeca-1,2-diene **19b\*** as a colourless liquid (0.030 g, 79 %).

$\nu_{\text{max}}$  (KBr/film) 2956 s, 2928 s, 2857 s, 1925 s (C=C=C), 1464 w, 1250 w, 838 s, 825 s, 809 s, 771  $\text{m cm}^{-1}$ ;  $\delta_{\text{H}}$  (270 MHz,  $\text{CDCl}_3$ ) 0.03 (6 H, s;  $\text{Si}(\underline{\text{CH}_3})_2$ ), 0.86 (3 H, t,  $J_{9,8} = 7$  Hz,  $\text{H}_9$ ), 0.88 (9 H, s,  $\text{SiC}(\underline{\text{CH}_3})_3$ ), 1.22-1.33 (8 H, m,  $\text{H}_{6,7,8,9}$ ), 1.44 (2 H, p,  $J = 7.5$  Hz,  $\text{H}_5$ ), 1.86-1.94 (2 H, m,  $\text{H}_4$ ), 4.31 (2 H, t,  $J_{1-4} = 3.5$  Hz,  $\text{H}_1$ );  $\delta_{\text{C}}$  (75 MHz,  $\text{CDCl}_3$ ) - 6.2  $\text{Si}(\underline{\text{CH}_3})_2$ , 14.1  $\text{C}_{10}$ , 18.8  $\text{SiC}(\underline{\text{CH}_3})_3$ , 22.7  $\text{C}_9$ , 26.7  $\text{SiC}(\underline{\text{CH}_3})_3$ , 28.9, 29.2, 29.3, 29.4  $\text{C}_{5,6,7,8}$ , 31.9  $\text{C}_4$ , 69.2  $\text{C}_1$ , 92.6  $\text{C}_3$ , 209.4  $\text{C}_2$ ;  $m/z$  (CI+,  $\text{NH}_3$ ) 270 ( $[\text{M}+\text{NH}_4]^+$ , 10), 253 ( $[\text{M}+\text{H}]^+$ , 78), 214 (36), 212 (25), 137 (44), 132 ( $[\text{TBS}+\text{NH}_3]^+$ , 100), 92 (24), 90 (42); HRMS (CI+) Found  $[\text{M}+\text{H}]^+$  253.2356  $\text{C}_{16}\text{H}_{33}\text{Si}$ , requires 253.2352

### 1-Phenyl-2-triethylsilylbuta-2,3-diene **19c**

Carried out by the general procedure above with  $\text{Cp}_2\text{TiMe}_2$  (3 ml, 1.5 mmol) and 3-phenyl-2-triethylsilylpropen-1-one **1c** (0.123 g, 0.5 mmol). The crude product was purified by flash chromatography (100 % petroleum ether) to yield 1-phenyl-2-triethylsilylbuta-2,3-diene **19c** as a colourless liquid (0.090 g, 75 %).

$\nu_{\text{max}}$  (KBr/film) 2952 s, 2910 m, 2875 m, 1926 s (C=C=C), 1494 w, 1454 w, 1415 w, 1238 w, 1006 m, 809 m, 755 w, 734 s, 717 s, 698  $\text{s cm}^{-1}$ ;  $\delta_{\text{H}}$  (270 MHz,  $\text{CDCl}_3$ ) 0.55 (6 H, q,  $J = 8$  Hz,  $\text{SiCH}_2\text{CH}_3$ ), 0.89 (9 H, t,  $J = 8$  Hz,  $\text{SiCH}_2\text{CH}_3$ ), 3.28 (2 H, t,  $J_{1-4} = 3$  Hz,  $\text{H}_1$ ), 4.28 (2 H, t,  $J_{4-1} = 3$  Hz,  $\text{H}_4$ ), 7.13-7.29 (5 H, m, Ph);  $\delta_{\text{C}}$  (75 MHz,  $\text{CDCl}_3$ ) 3.1  $\text{SiCH}_2\text{CH}_3$ , 7.2  $\text{SiCH}_2\text{CH}_3$ , 36.4  $\text{C}_1$ , 68.7  $\text{C}_4$ , 91.5  $\text{C}_2$ , 126.0  $\text{C}_4'$ , 128.0, 128.9  $\text{C}_{2,3'}$ , 140.5  $\text{C}_{1'}$ , 210.6  $\text{C}_3$ ;  $m/z$  (CI+,  $\text{NH}_3$ ) 245 ( $[\text{M}+\text{H}]^+$ , 73), 132 ( $[\text{SiEt}_3+\text{NH}_3]^+$ , 100); HRMS (CI+) Found  $[\text{M}+\text{H}]^+$  245.1718  $\text{C}_{16}\text{H}_{25}\text{Si}$  requires 245.1725

### 1-Cyclohexyl-1-triethylsilylpropa-1,2-diene **19d**

Carried out by the general procedure above with  $\text{Cp}_2\text{TiMe}_2$  (12 ml, 6 mmol) and 2-cyclohexyl-2-triethylsilylethen-1-one **1d** (0.477 g, 2 mmol). The crude product was purified by flash chromatography (100 % petroleum ether) to yield 1-cyclohexyl-1-triethylsilylpropa-1,2-diene **19d** as a colourless liquid (0.39 g, 82 %).

$\nu_{\text{max}}$  (KBr/film) 2942 s, 2925 s, 2879 m, 1920 s (C=C=C), 1448 w, 1415 w, 1238 w, 1074 w, 1016 w, 808 m, 730 s, 717 s  $\text{cm}^{-1}$ ;  $\delta_{\text{H}}$  (270 MHz,  $\text{CDCl}_3$ ) 0.59 (6 H, q,  $J = 8$  Hz,  $\text{SiCH}_2\text{CH}_3$ ), 0.91 (9 H, t,  $J = 8$  Hz,  $\text{SiCH}_2\text{CH}_3$ ), 1.10-1.28 (5 H, m), 1.56-1.80 (6 H, m), 4.30 (2 H, d,  $J_{3-1} = 1.5$  Hz,  $\text{H}_3$ );  $\delta_{\text{C}}$  (75 MHz,  $\text{CDCl}_3$ ) 3.4  $\text{SiCH}_2\text{CH}_3$ , 7.4  $\text{SiCH}_2\text{CH}_3$ , 26.1  $\text{C}_{4'}$ , 26.8, 33.9  $\text{C}_{2',3'}$ , 37.9  $\text{C}_{1'}$ , 69.3  $\text{C}_3$ , 97.2  $\text{C}_1$ , 208.9  $\text{C}_2$ ;  $m/z$  ( $\text{Cl}^+$ ,  $\text{NH}_3$ ) 237 ( $[\text{M}+\text{H}]^+$ , 52), 226 (14), 172 (14), 132 ( $[\text{SiEt}_3+\text{NH}_3]^+$ , 100); HRMS ( $\text{Cl}^+$ ) Found  $[\text{M}+\text{H}]^+$  237.2032  $\text{C}_{15}\text{H}_{29}\text{Si}$ , requires 237.2038

### 1-Phenyl-1-triethylsilylpropa-1,2-diene 19e

Carried out by the general procedure for the preparation of silyl allenes with  $\text{Cp}_2\text{TiMe}_2$  (4 ml, 2 mmol) and 2-phenyl-2-triethylsilylethen-1-one **1e** (0.116 g, 0.5 mmol). The crude product was purified by flash chromatography (100 % petroleum ether) to 1-phenyl-1-triethylsilylpropa-1,2-diene **19e** as a colourless liquid (0.044 g, 38 %).

$\nu_{\text{max}}$  (KBr/film) 2954 s, 2910 m, 2875 s, 1918 s (C=C=C), 1596 w, 1490 w, 1459 w, 1415 w, 1238 w, 1004 m, 813 m, 761 m, 734 s, 721 s, 696 s  $\text{cm}^{-1}$ ;  $\delta_{\text{H}}$  (300 MHz,  $\text{CDCl}_3$ ) 0.73 (6 H, q,  $J = 8$  Hz,  $\text{SiCH}_2\text{CH}_3$ ), 0.95 (9 H, t,  $J = 8$  Hz,  $\text{SiCH}_2\text{CH}_3$ ), 4.64 (2 H, s,  $\text{H}_3$ ), 7.15-7.19 (1 H, m,  $\text{H}_{4'}$ ), 7.24-7.28 (4 H, m,  $\text{H}_{2',3'}$ );  $\delta_{\text{C}}$  (75 MHz,  $\text{CDCl}_3$ ) 3.5  $\text{SiCH}_2\text{CH}_3$ , 7.3  $\text{SiCH}_2\text{CH}_3$ , 69.7  $\text{C}_1$ , 95.6  $\text{C}_3$ , 126.1  $\text{C}_{4'}$ , 127.6, 128.4  $\text{C}_{2',3'}$ , 137.6  $\text{C}_{1'}$ , 211.8  $\text{C}_2$ ;  $m/z$  ( $\text{Cl}^+$ ,  $\text{NH}_3$ ) 231 ( $[\text{M}+\text{H}]^+$ , 74), 132 ( $[\text{SiEt}_3+\text{NH}_3]^+$ , 100); HRMS ( $\text{Cl}^+$ ) Found  $[\text{M}+\text{H}]^+$  231.1564  $\text{C}_{15}\text{H}_{23}\text{Si}$ , requires 231.1569
